# Supplementary material
Source: PubMed Central journal article supplement (PMC3281725)
Supplement: supp_M111.314831_jbc.M111.314831-1.pdf [file supp_M111.314831_jbc.M111.314831-1.pdf]

**The fucose-binding lectin from opportunistic pathogen *Burkholderia ambifaria* binds to both plant and human oligosaccharidic epitopes**

**Aymeric Audfray<sup>†</sup>, Julie Claudinon<sup>‡</sup>, Saïda Abounit<sup>#</sup>, Nathalie Ruvoën-Clouet<sup>‡</sup>, Göran Larson<sup>§</sup>,  
David F. Smith<sup>±</sup>, Michaela Wimmerova<sup>¶</sup>, Jacques Le Pendu<sup>‡</sup>, Winfried Römer<sup>‡,¶</sup>, Annabelle  
Varrot<sup>‡</sup>, Anne Imberty<sup>†\*</sup>**

**Supporting information for publication**

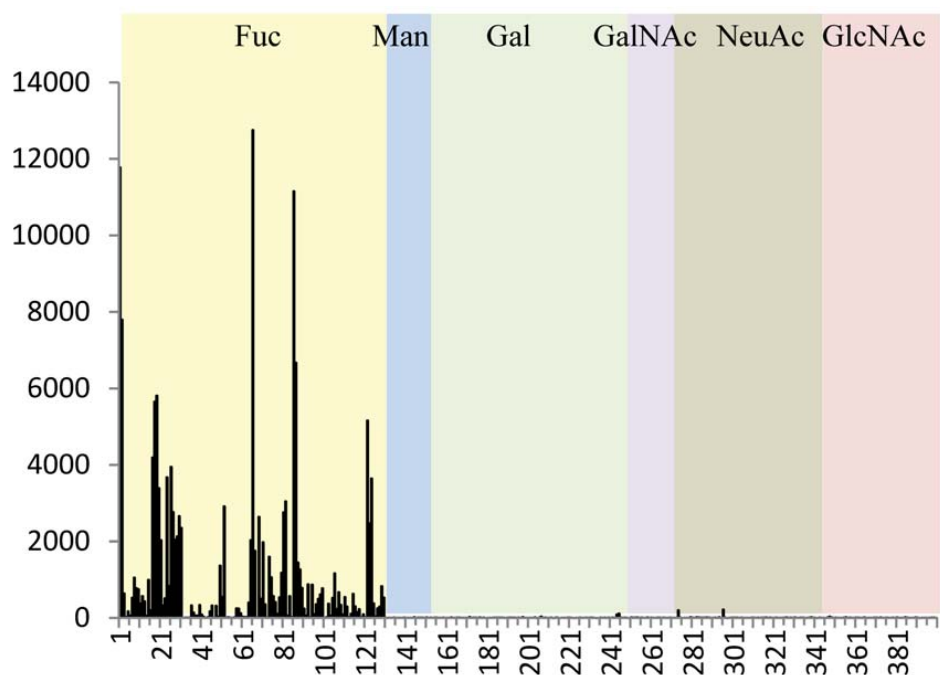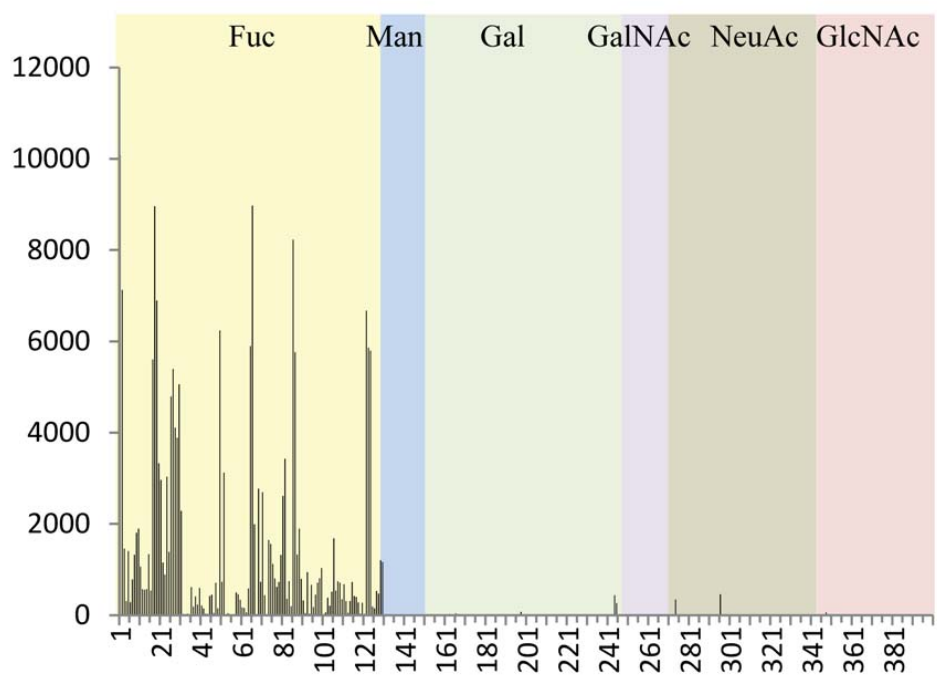

Figure S1. Comparison of binding specificities of BambL 0.2 µg ml<sup>-1</sup> (top) and RSL 0.2 µg ml<sup>-1</sup> (bottom) from the Glycan Array data obtained at Consortium for Functional Glycomics

(<http://www.functionalglycomics.org>). Glycans have been ordered as a function of terminal monosaccharides with removal of duplicates.

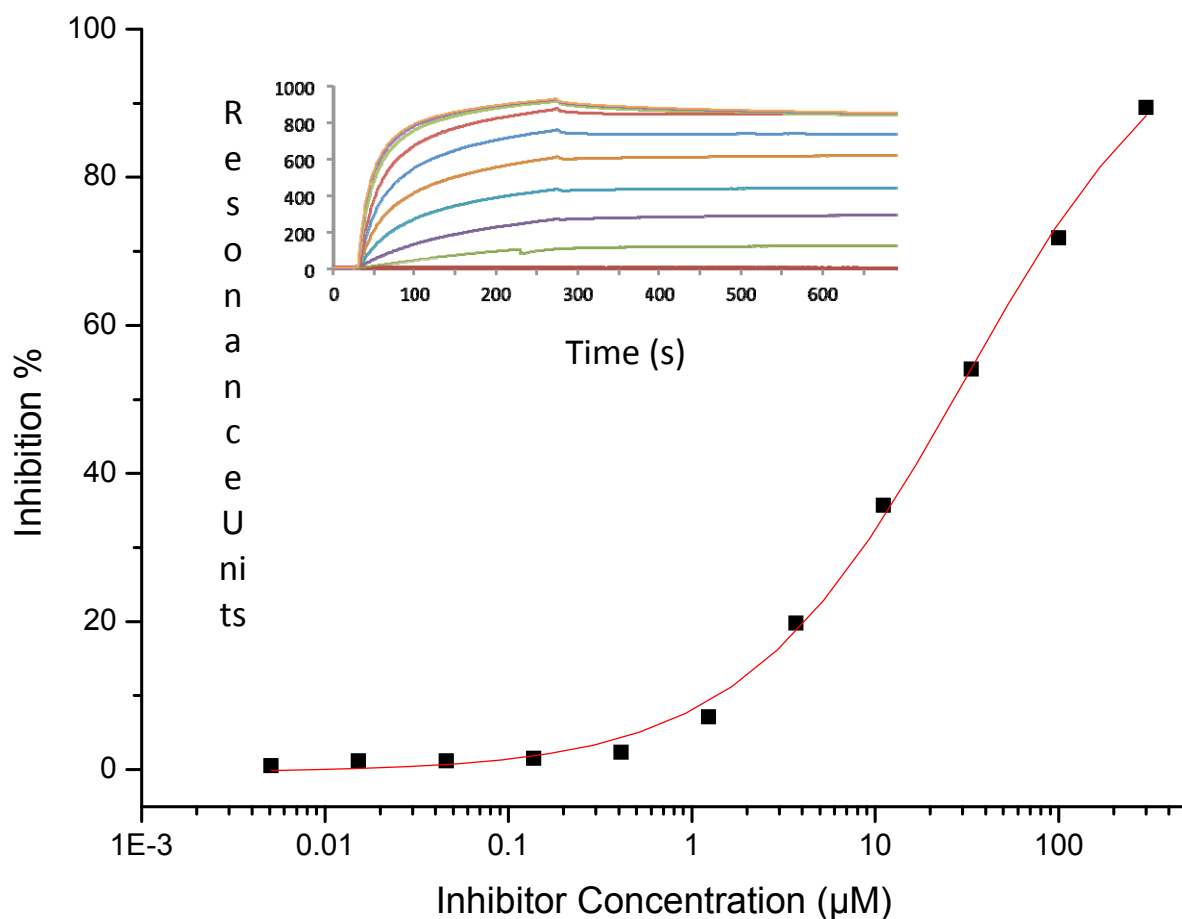

Figure S2. SPR analysis showing inhibition of BambL binding to a fucosylated surface by H-type 2 tetrasaccharide. Sensorgrams show injections of BambL (1 μM) mixed with increasing concentrations of H-type 2 tetrasaccharide (from 0.005 μM, upper sensorgram, to 300 μM, lower sensorgram). Equilibrium response (Req) is used to construct inhibition curve. Experiments were carried out at 25°C at a flow rate of 10 μl min<sup>-1</sup>.



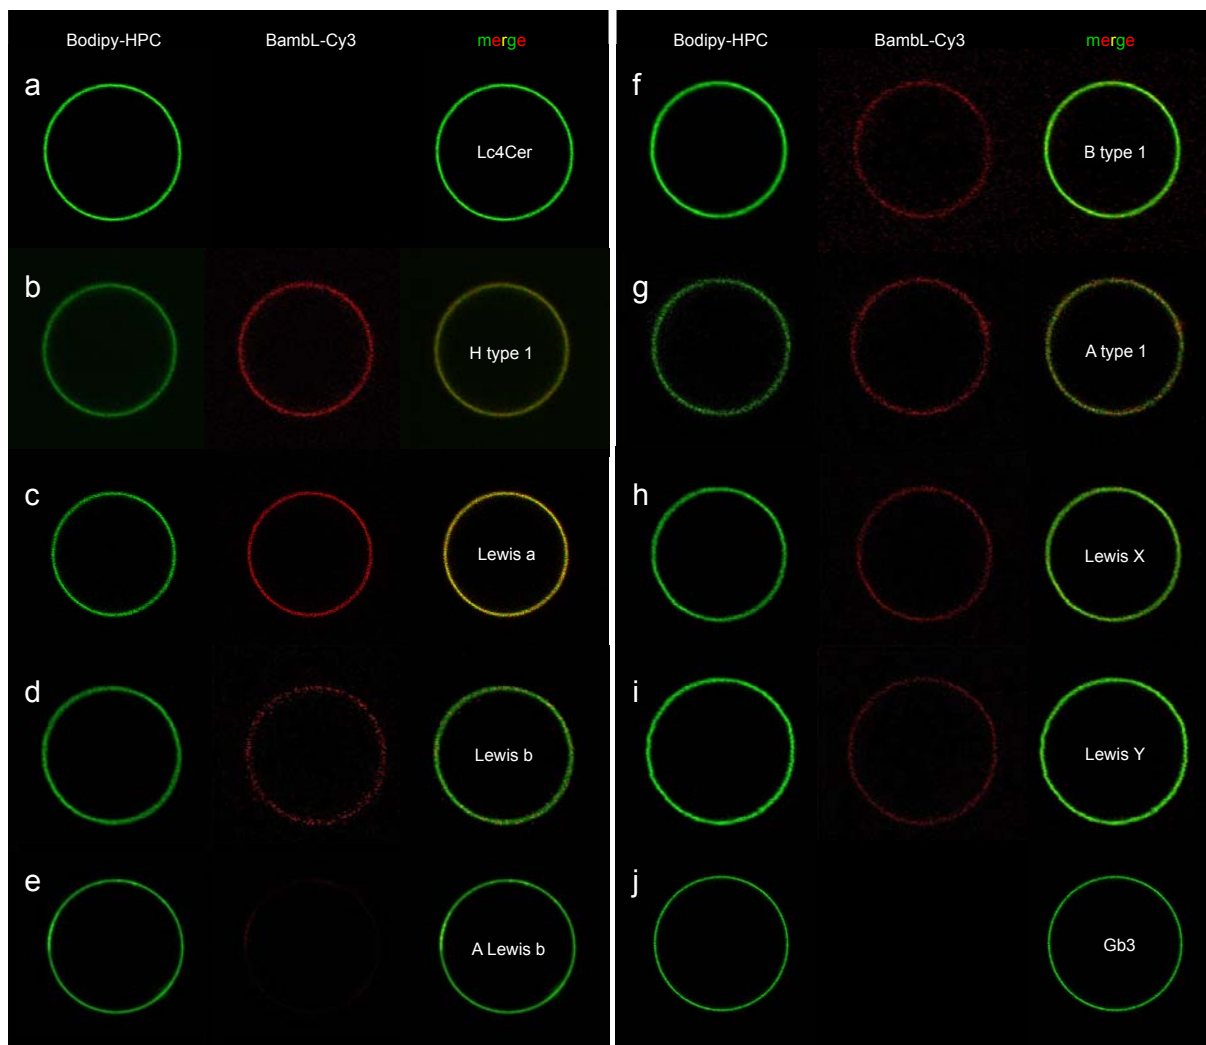

Figure S4. **Giant unilamellar vesicles.** Bambl-binding to various glycosphingolipids is dependent on short fucosylated carbohydrate structures. (a–j) Confocal sections in the equatorial plane of GUVs made from a mixture of 64 mol% DOPC, 1 mol% BodipyFI-C5-HPC (green), 30 mol% cholesterol and 5 mol% of glycosphingolipid. (a–g) type 1 series: (a) Lactotetraosylceramide (Lc4Cer; non-fucosylated precursor), (b) H-type 1, (c) Lewis a, (d) Lewis b, (e) A Lewis b, (f) B type 1, (g) A type 1, (h,i) type 2 series: (h) Lewis X, (i) Lewis Y, (j) globotriaosylceramide (Gb3). Fluorescence-labeled Bambl is shown in red. All acquisitions were performed with the same excitation and emission gains. The diameters of the vesicles were all within 10 to 30  $\mu\text{m}$ .

Table S1. Glycan array (v4.1) data for BambL arranged by the averaged rank calculated from three concentrations

| Chart # | Glycan Structure                                                                              | BambL 1 µg/ml |      |      | BambL 0.2 µg/ml |      |      | BambL 0.05 µg/ml |      |      | Aver. Rank |
|---------|-----------------------------------------------------------------------------------------------|---------------|------|------|-----------------|------|------|------------------|------|------|------------|
|         |                                                                                               | Aver.         | % CV | Rank | Aver.           | % CV | Rank | Aver.            | % CV | Rank |            |
| 79      | Fuca1-3GlcNAcβ-Sp8                                                                            | 36274         | 2    | 100  | 11151           | 9    | 87   | 3908             | 3    | 100  | 96         |
| 6       | Fuca-Sp8                                                                                      | 35197         | 3    | 97   | 11778           | 2    | 92   | 3191             | 8    | 82   | 90         |
| 80      | Fuca1-4GlcNAcβ-Sp8                                                                            | 33058         | 14   | 91   | 12754           | 6    | 100  | 2578             | 24   | 66   | 86         |
| 7       | Fuca-Sp9                                                                                      | 32357         | 4    | 89   | 9604            | 12   | 75   | 3600             | 3    | 92   | 86         |
| 78      | Fuca1-2Galβ-Sp8                                                                               | 26289         | 7    | 72   | 7796            | 3    | 61   | 2255             | 7    | 58   | 64         |
| 81      | Fucβ1-3GlcNAcβ-Sp8                                                                            | 23342         | 2    | 64   | 6669            | 6    | 52   | 1701             | 4    | 44   | 53         |
| 74      | Fuca1-2Galβ1-4GlcNAcβ1-3Galβ1-4GlcNAcβ1-3Galβ1-4GlcNAcβ-Sp0                                   | 25593         | 7    | 71   | 5653            | 2    | 44   | 1443             | 6    | 37   | 51         |
| 75      | Fuca1-2Galβ1-4GlcNAcβ-Sp0                                                                     | 24469         | 7    | 67   | 5203            | 8    | 41   | 1672             | 9    | 43   | 50         |
| 76      | Fuca1-2Galβ1-4GlcNAcβ-Sp8                                                                     | 22830         | 15   | 63   | 5809            | 7    | 46   | 1626             | 11   | 42   | 50         |
| 69      | Fuca1-2Galβ1-4(Fuca1-3)GlcNAcβ1-3Galβ1-4(Fuca1-3)GlcNAcβ-Sp0                                  | 24656         | 8    | 68   | 5159            | 9    | 40   | 1038             | 6    | 27   | 45         |
| 71      | Fuca1-2Galβ1-4(Fuca1-3)GlcNAcβ-Sp0                                                            | 22439         | 17   | 62   | 5562            | 13   | 44   | 1021             | 20   | 26   | 44         |
| 73      | Fuca1-2Galβ1-4GlcNAcβ1-3Galβ1-4GlcNAcβ-Sp0                                                    | 23214         | 6    | 64   | 4190            | 13   | 33   | 1251             | 11   | 32   | 43         |
| 90      | GalNAcα1-3(Fuca1-2)Galβ-Sp18                                                                  | 21223         | 1    | 59   | 4272            | 6    | 34   | 1161             | 9    | 30   | 41         |
| 218     | Fuca1-2[6OSO3]Galβ1-4GlcNAc-Sp0                                                               | 18810         | 8    | 52   | 3944            | 7    | 31   | 1097             | 3    | 28   | 37         |
| 72      | Fuca1-2Galβ1-4(Fuca1-3)GlcNAcβ-Sp8                                                            | 19573         | 5    | 54   | 3642            | 7    | 29   | 824              | 8    | 21   | 35         |
| 77      | Fuca1-2Galβ1-4Glcβ-Sp0                                                                        | 13229         | 8    | 36   | 3390            | 5    | 27   | 1401             | 4    | 36   | 33         |
| 60      | Fuca1-2Galβ1-3(Fuca1-4)GlcNAcβ-Sp8                                                            | 17009         | 7    | 47   | 3043            | 5    | 24   | 992              | 15   | 25   | 32         |
| 219     | Fuca1-2Galβ1-4[6OSO3]GlcNAc-Sp8                                                               | 16588         | 6    | 46   | 2765            | 8    | 22   | 1075             | 3    | 28   | 32         |
| 70      | Fuca1-2Galβ1-4(Fuca1-3)GlcNAcβ1-3Galβ1-4(Fuca1-3)GlcNAcβ1-3Galβ1-4(Fuca1-3)GlcNAcβ-Sp0        | 18132         | 5    | 50   | 2468            | 5    | 19   | 689              | 6    | 18   | 29         |
| 260     | Fuca1-2Galβ1-4[6OSO3]Glc-Sp0                                                                  | 14864         | 6    | 41   | 2659            | 43   | 21   | 662              | 64   | 17   | 26         |
| 107     | Galα1-3(Fuca1-2)Galβ-Sp8                                                                      | 11862         | 4    | 33   | 2914            | 8    | 23   | 836              | 8    | 21   | 26         |
| 125     | Galβ1-3(Fuca1-4)GlcNAcβ1-3Galβ1-4(Fuca1-3)GlcNAcβ-Sp0                                         | 16158         | 11   | 45   | 2639            | 7    | 21   | 447              | 16   | 11   | 26         |
| 384     | Fuca1-2Galβ1-3(Fuca1-4)GlcNAcβ1-3(Galβ1-4(Fuca1-3)GlcNAcβ1-6)Galβ1-4Glc-Sp21                  | 13337         | 11   | 37   | 2754            | 3    | 22   | 682              | 36   | 17   | 25         |
| 129     | Galβ1-3(Fuca1-4)GlcNAc-Sp8                                                                    | 13713         | 10   | 38   | 2467            | 10   | 19   | 717              | 13   | 18   | 25         |
| 89      | GalNAcα1-3(Fuca1-2)Galβ-Sp8                                                                   | 12180         | 3    | 34   | 2348            | 6    | 18   | 786              | 7    | 20   | 24         |
| 451     | Fuca1-2Galβ1-4GlcNAcβ1-3(Fuca1-2Galβ1-4GlcNAcβ1-6)GalNAc-Sp14                                 | 10585         | 90   | 29   | 3671            | 35   | 29   | 540              | 102  | 14   | 24         |
| 220     | Fuca1-2[6OSO3]Galβ1-4[6OSO3]Glc-Sp0                                                           | 12815         | 3    | 35   | 2036            | 4    | 16   | 669              | 10   | 17   | 23         |
| 246     | Fuca1-2[6OSO3]Galβ1-4Glc-Sp0                                                                  | 11818         | 8    | 33   | 2124            | 6    | 17   | 532              | 7    | 14   | 21         |
| 118     | Galα1-4(Fuca1-2)Galβ1-4GlcNAcβ-Sp8                                                            | 9357          | 4    | 26   | 2028            | 12   | 16   | 584              | 22   | 15   | 19         |
| 128     | Galβ1-3(Fuca1-4)GlcNAcβ-Sp8                                                                   | 11845         | 9    | 33   | 1975            | 11   | 15   | 296              | 31   | 8    | 19         |
| 127     | Galβ1-3(Fuca1-4)GlcNAcβ-Sp0                                                                   | 10858         | 10   | 30   | 1976            | 11   | 15   | 342              | 13   | 9    | 18         |
| 360     | Fuca1-2Galβ1-4GlcNAcβ1-2Manα1-3(Fuca1-2Galβ1-4GlcNAcβ1-2Manα1-6)Manβ1-4GlcNAcβ1-4GlcNAcβ-Sp20 | 9528          | 22   | 26   | 2027            | 12   | 16   | 447              | 68   | 11   | 18         |
| 290     | Galβ1-4(Fuca1-3)GlcNAcβ1-3Galβ1-3(Fuca1-4)GlcNAcβ-Sp0                                         | 11853         | 11   | 33   | 1598            | 34   | 13   | 289              | 59   | 7    | 18         |
| 275     | Galβ1-3(Fuca1-4)GlcNAcβ1-3Galβ1-3(Fuca1-4)GlcNAcβ-Sp0                                         | 10083         | 15   | 28   | 1757            | 7    | 14   | 259              | 24   | 7    | 16         |
| 93      | GalNAcα1-4(Fuca1-2)Galβ1-4GlcNAcβ-Sp8                                                         | 7820          | 9    | 22   | 1365            | 9    | 11   | 487              | 7    | 12   | 15         |
| 108     | Galα1-3(Fuca1-2)Galβ-Sp18                                                                     | 8217          | 22   | 23   | 1401            | 20   | 11   | 382              | 16   | 10   | 14         |
| 383     | Fuca1-2Galβ1-3(Fuca1-4)GlcNAcβ1-3(Galβ1-4GlcNAcβ1-6)Galβ1-4Glc-Sp21                           | 7712          | 16   | 21   | 1182            | 29   | 9    | 481              | 20   | 12   | 14         |
| 151     | Galβ1-4(Fuca1-3)GlcNAcβ1-4Galβ1-4(Fuca1-3)GlcNAcβ-Sp0                                         | 8701          | 8    | 24   | 1448            | 6    | 11   | 292              | 16   | 7    | 14         |
| 27      | [3OSO3]Galβ1-3(Fuca1-4)GlcNAcβ-Sp8                                                            | 7890          | 5    | 22   | 1064            | 3    | 8    | 355              | 29   | 9    | 13         |
| 152     | Galβ1-4(Fuca1-3)GlcNAcβ1-4Galβ1-4(Fuca1-3)GlcNAcβ1-4Galβ1-4(Fuca1-3)GlcNAcβ-Sp0               | 8299          | 5    | 23   | 1268            | 5    | 10   | 120              | 45   | 3    | 12         |

|     |                                                                                                                 |      |    |    |      |    |   |     |    |   |    |
|-----|-----------------------------------------------------------------------------------------------------------------|------|----|----|------|----|---|-----|----|---|----|
| 150 | Galβ1-4(Fuca1-3)GlcNAcβ-Sp8                                                                                     | 6660 | 4  | 18 | 1164 | 6  | 9 | 216 | 25 | 6 | 11 |
| 61  | Fuca1-2Galβ1-3GalNAcα-Sp8                                                                                       | 6101 | 7  | 17 | 1054 | 2  | 8 | 309 | 11 | 8 | 11 |
| 367 | Fuca1-2Galβ1-3GlcNAcβ1-3(Galβ1-4(Fuca1-3)GlcNAcβ1-6)Galβ1-4Glc-Sp21                                             | 6119 | 8  | 17 | 992  | 3  | 8 | 217 | 17 | 6 | 10 |
| 97  | GalNAcβ1-4(Fuca1-3)GlcNAcβ-Sp0                                                                                  | 5440 | 11 | 15 | 773  | 29 | 6 | 336 | 7  | 9 | 10 |
| 67  | Fuca1-2Galβ1-3GlcNAcβ-Sp0                                                                                       | 5730 | 11 | 16 | 864  | 13 | 7 | 154 | 46 | 4 | 9  |
| 95  | GalNAcβ1-3(Fuca1-2)Galβ-Sp8                                                                                     | 5663 | 1  | 16 | 547  | 9  | 4 | 258 | 11 | 7 | 9  |
| 351 | Galβ1-4GlcNAcβ1-2Mana1-3(Galβ1-4GlcNAcβ1-2Mana1-6)Manβ1-4GlcNAcβ1-4(Fuca1-6)GlcNAcβ-Sp22                        | 5958 | 12 | 16 | 826  | 7  | 6 | 130 | 31 | 3 | 9  |
| 325 | Fuca1-3(Galβ1-4)GlcNAcβ1-2Mana1-3(Fuca1-3(Galβ1-4)GlcNAcβ1-2Mana1-6)Manβ1-4GlcNAcβ1-4GlcNAcβ-Sp20               | 5806 | 12 | 16 | 876  | 15 | 7 | 123 | 33 | 3 | 9  |
| 382 | Galβ1-3GlcNAcβ1-3(Galβ1-4(Fuca1-3)GlcNAcβ1-6)Galβ1-4Glc-Sp21                                                    | 4805 | 9  | 13 | 783  | 11 | 6 | 226 | 23 | 6 | 8  |
| 113 | Galα1-3Galβ1-4(Fuca1-3)GlcNAcβ-Sp8                                                                              | 4104 | 7  | 11 | 867  | 4  | 7 | 269 | 9  | 7 | 8  |
| 65  | Fuca1-2Galβ1-3GlcNAcβ1-3Galβ1-4Glcβ-Sp8                                                                         | 5409 | 5  | 15 | 780  | 8  | 6 | 153 | 37 | 4 | 8  |
| 429 | Galβ1-4GlcNAcβ1-3Galβ1-4(Fuca1-3GlcNAcβ1-6)Galβ1-4Glc-Sp21                                                      | 4726 | 14 | 13 | 615  | 14 | 5 | 243 | 11 | 6 | 8  |
| 149 | Galβ1-4(Fuca1-3)GlcNAcβ-Sp0                                                                                     | 5379 | 13 | 15 | 831  | 13 | 7 | 99  | 39 | 3 | 8  |
| 428 | Fuca1-2Galβ1-3GlcNAcβ1-3(Galβ1-4GlcNAcβ1-6)Galβ1-4Glc-Sp21                                                      | 5050 | 12 | 14 | 638  | 43 | 5 | 171 | 44 | 4 | 8  |
| 388 | Fuca1-2Galβ1-3GalNAcα1-3(Fuca1-2)Galβ1-4Glcβ-Sp0                                                                | 5742 | 4  | 16 | 567  | 27 | 4 | 97  | 43 | 2 | 8  |
| 32  | [3OSO3]Galβ1-4(Fuca1-3)GlcNAcβ-Sp8                                                                              | 4777 | 8  | 13 | 672  | 8  | 5 | 160 | 30 | 4 | 8  |
| 31  | [3OSO3]Galβ1-4(Fuca1-3)GlcNAc-Sp0                                                                               | 4119 | 13 | 11 | 596  | 11 | 5 | 189 | 15 | 5 | 7  |
| 237 | Neu5Acα2-3Galβ1-3(Fuca1-4)GlcNAcβ-Sp8                                                                           | 4115 | 14 | 11 | 568  | 37 | 4 | 177 | 54 | 5 | 7  |
| 68  | Fuca1-2Galβ1-3GlcNAcβ-Sp8                                                                                       | 3942 | 10 | 11 | 749  | 16 | 6 | 134 | 35 | 3 | 7  |
| 340 | GlcNAcα1-4Galβ1-4GlcNAcβ1-3Galβ1-4(Fuca1-3)GlcNAcβ1-3Galβ1-4(Fuca1-3)GlcNAcβ-Sp0                                | 4582 | 8  | 13 | 522  | 28 | 4 | 119 | 64 | 3 | 7  |
| 288 | Galβ1-4(Fuca1-3)[6OSO3]GlcNAc-Sp0                                                                               | 4355 | 1  | 12 | 546  | 7  | 4 | 124 | 27 | 3 | 6  |
| 59  | Fuca1-2Galβ1-3GalNAcβ1-3Galα1-4Galβ1-4Glcβ-Sp9                                                                  | 4065 | 7  | 11 | 527  | 9  | 4 | 151 | 12 | 4 | 6  |
| 361 | Fuca1-2Galβ1-4(Fuca1-3)GlcNAcβ1-2Mana1-3(Fuca1-2Galβ1-4(Fuca1-3)GlcNAcβ1-2Mana1-6)Manβ1-4GlcNAcβ1-4GlcNAcβ-Sp20 | 3887 | 5  | 11 | 379  | 52 | 3 | 191 | 46 | 5 | 6  |
| 251 | Neu5Acα2-3Galβ1-4(Fuca1-3)GlcNAcβ1-3Galβ1-4(Fuca1-3)GlcNAcβ1-3Galβ1-4(Fuca1-3)GlcNAcβ-Sp0                       | 4602 | 19 | 13 | 627  | 4  | 5 | 13  | 67 | 0 | 6  |
| 126 | Galβ1-3(Fuca1-4)GlcNAcβ1-3Galβ1-4GlcNAcβ-Sp0                                                                    | 3885 | 3  | 11 | 503  | 9  | 4 | 99  | 26 | 3 | 6  |
| 408 | Galα1-3(Fuca1-2)Galβ1-4(Fuca1-3)Glcβ-Sp21                                                                       | 3636 | 12 | 10 | 570  | 9  | 4 | 102 | 20 | 3 | 6  |
| 419 | Fuca1-2Galβ1-4GlcNAcβ1-2Mana1-3(Fuca1-2Galβ1-4GlcNAcβ1-2Mana1-6)Manβ1-4GlcNAcβ1-4(Fuca1-6)GlcNAcβ-Sp22          | 2951 | 8  | 8  | 833  | 11 | 7 | 95  | 48 | 2 | 6  |
| 389 | Fuca1-2Galβ1-3GalNAcα1-3(Fuca1-2)Galβ1-4GlcNAcβ-Sp0                                                             | 4149 | 6  | 11 | 434  | 11 | 3 | 79  | 22 | 2 | 6  |
| 238 | Neu5Acα2-3Galβ1-3(Fuca1-4)GlcNAcβ1-3Galβ1-4(Fuca1-3)GlcNAcβ-Sp0                                                 | 3618 | 9  | 10 | 537  | 15 | 4 | 77  | 90 | 2 | 5  |
| 359 | Fuca1-2Galβ1-3GlcNAcβ1-2Mana1-3(Fuca1-2Galβ1-3GlcNAcβ1-2Mana1-6)Manβ1-4GlcNAcβ1-4GlcNAcβ-Sp20                   | 3477 | 15 | 10 | 380  | 14 | 3 | 138 | 27 | 4 | 5  |
| 329 | Neu5Acα2-3Galβ1-3(Fuca1-4)GlcNAcβ1-3Galβ1-3(Fuca1-4)GlcNAcβ-Sp0                                                 | 3362 | 18 | 9  | 414  | 9  | 3 | 131 | 42 | 3 | 5  |
| 159 | Galβ1-4GlcNAcβ1-3Galβ1-4(Fuca1-3)GlcNAcβ1-3Galβ1-4(Fuca1-3)GlcNAcβ-Sp0                                          | 3644 | 5  | 10 | 498  | 10 | 4 | 64  | 58 | 2 | 5  |
| 66  | Fuca1-2Galβ1-3GlcNAcβ1-3Galβ1-4Glcβ-Sp10                                                                        | 3345 | 10 | 9  | 481  | 3  | 4 | 97  | 22 | 2 | 5  |
| 350 | GlcNAcβ1-2Mana1-3(GlcNAcβ1-2Mana1-6)Manβ1-4GlcNAcβ1-4(Fuca1-6)GlcNAcβ-Sp22                                      | 3512 | 6  | 10 | 530  | 3  | 4 | 59  | 25 | 2 | 5  |
| 268 | Neu5Acα2-6Galβ1-4GlcNAcβ1-3Galβ1-4(Fuca1-3)GlcNAcβ1-3Galβ1-4(Fuca1-3)GlcNAcβ-Sp0                                | 3577 | 6  | 10 | 371  | 14 | 3 | 56  | 26 | 1 | 5  |
| 333 | GalNAcα1-3(Fuca1-2)Galβ1-4GlcNAcβ1-3Galβ1-4GlcNAcβ-Sp0                                                          | 3428 | 3  | 9  | 335  | 5  | 3 | 69  | 36 | 2 | 5  |
| 458 | Neu5Acα2-6Galβ1-4GlcNAcβ1-6(Fuca1-2Galβ1-3GlcNAcβ1-3)Galβ1-4Glc-Sp21                                            | 3858 | 4  | 11 | 168  | 63 | 1 | 54  | 48 | 1 | 4  |
| 385 | Galβ1-3GlcNAcβ1-3(Galβ1-3GlcNAcβ1-3Galβ1-4(Fuca1-3)GlcNAcβ1-6)Galβ1-4Glc-Sp21                                   | 2840 | 6  | 8  | 353  | 51 | 3 | 100 | 39 | 3 | 4  |

|     |                                                                                                                                             |      |    |   |     |    |   |     |     |   |   |
|-----|---------------------------------------------------------------------------------------------------------------------------------------------|------|----|---|-----|----|---|-----|-----|---|---|
| 445 | Fuca1-2Galβ1-4GlcNAcβ1-2(Fuca1-2Galβ1-4GlcNAcβ1-4)Mana1-3(Fuca1-2Galβ1-4GlcNAcβ1-2)Manβ1-4GlcNAcβ1-4GlcNAcβ-Sp12                            | 2853 | 7  | 8 | 511 | 9  | 4 | 43  | 72  | 1 | 4 |
| 84  | [3OSO3]Galβ1-4(Fuca1-3)Glc-Sp0                                                                                                              | 2645 | 23 | 7 | 341 | 61 | 3 | 110 | 10  | 3 | 4 |
| 459 | GalNAca1-3(Fuca1-2)Galβ1-3GlcNAcβ1-2Mana1-6(GalNAca1-3(Fuca1-2)Galβ1-3GlcNAcβ1-2)Manβ1-4GlcNAcβ1-4(Fuca1-6)GlcNAcβ-Sp22                     | 2506 | 15 | 7 | 324 | 24 | 3 | 119 | 12  | 3 | 4 |
| 289 | Galβ1-4(Fuca1-3)[6OSO3]Glc-Sp0                                                                                                              | 2529 | 5  | 7 | 294 | 34 | 2 | 89  | 18  | 2 | 4 |
| 398 | Fuca1-2Galβ1-4GlcNAcβ1-3GalNAca-Sp14                                                                                                        | 2859 | 10 | 8 | 326 | 44 | 3 | 41  | 60  | 1 | 4 |
| 155 | Galβ1-4GalNAca1-3(Fuca1-2)Galβ1-4GlcNAcβ-Sp8                                                                                                | 2447 | 6  | 7 | 315 | 35 | 2 | 69  | 23  | 2 | 4 |
| 456 | GalNAca1-3(Fuca1-2)Galβ1-4GlcNAcβ1-2Mana1-6(GalNAca1-3(Fuca1-2)Galβ1-4GlcNAcβ1-2)Manβ1-4GlcNAcβ1-4(Fuca1-6)GlcNAcβ-Sp22                     | 2405 | 5  | 7 | 320 | 52 | 3 | 72  | 44  | 2 | 4 |
| 426 | Gala1-3(Fuca1-2)Galβ1-4GlcNAcβ1-2Mana1-3(Gala1-3(Fuca1-2)Galβ1-4GlcNAcβ1-2)Manβ1-4GlcNAcβ1-4(Fuca1-6)GlcNAcβ-Sp22                           | 2309 | 10 | 6 | 401 | 8  | 3 | 45  | 62  | 1 | 4 |
| 253 | Neu5Aca2-3Galβ1-4(Fuca1-3)GlcNAcβ-Sp8                                                                                                       | 2116 | 12 | 6 | 299 | 10 | 2 | 65  | 32  | 2 | 3 |
| 364 | Galβ1-3(Fuca1-4)GlcNAcβ1-2Mana1-3(Galβ1-3(Fuca1-4)GlcNAcβ1-2)Manβ1-4GlcNAcβ1-4(Fuca1-6)GlcNAcβ-Sp22                                         | 1993 | 7  | 5 | 357 | 37 | 3 | 56  | 61  | 1 | 3 |
| 457 | Gala1-3(Fuca1-2)Galβ1-3GlcNAcβ1-2Mana1-6(Gala1-3(Fuca1-2)Galβ1-3GlcNAcβ1-2)Manβ1-4GlcNAcβ1-4(Fuca1-6)GlcNAcβ-Sp22                           | 1929 | 4  | 5 | 246 | 30 | 2 | 83  | 9   | 2 | 3 |
| 399 | Galβ1-4(Fuca1-3)GlcNAcβ1-3GalNAca-Sp14                                                                                                      | 2399 | 16 | 7 | 243 | 23 | 2 | 17  | 109 | 0 | 3 |
| 352 | Galβ1-3GlcNAcβ1-2Mana1-3(Galβ1-3GlcNAcβ1-2)Manβ1-4GlcNAcβ1-4(Fuca1-6)GlcNAcβ-Sp22                                                           | 2075 | 4  | 6 | 290 | 10 | 2 | 33  | 30  | 1 | 3 |
| 441 | Neu5Aca2-3Galβ1-4GlcNAcβ1-3Galβ-Sp8                                                                                                         | 2087 | 4  | 6 | 217 | 36 | 2 | 44  | 33  | 1 | 3 |
| 453 | GalNAca1-3Fuca1-2Galβ1-4GlcNAcβ1-3(GalNAca1-3Fuca1-2Galβ1-4GlcNAcβ1-6)GalNAc-Sp14                                                           | 2167 | 7  | 6 | 168 | 4  | 1 | 44  | 12  | 1 | 3 |
| 448 | Galβ1-4GlcNAcβ1-6GalNAc-Sp14                                                                                                                | 1960 | 14 | 5 | 203 | 31 | 2 | 26  | 62  | 1 | 3 |
| 446 | Fuca1-2Galβ1-4(Fuca1-3)GlcNAcβ1-2(Fuca1-2Galβ1-4(Fuca1-3)GlcNAcβ1-4)Mana1-3(Fuca1-2Galβ1-4(Fuca1-3)GlcNAcβ1-2)Manβ1-4GlcNAcβ1-4GlcNAcβ-Sp12 | 1669 | 17 | 5 | 250 | 34 | 2 | 41  | 18  | 1 | 3 |
| 104 | Gala1-3(Fuca1-2)Galβ1-4(Fuca1-3)GlcNAcβ-Sp8                                                                                                 | 1808 | 6  | 5 | 241 | 22 | 2 | 22  | 22  | 1 | 2 |
| 255 | Neu5Aca2-3Galβ1-4(Fuca1-3)GlcNAcβ1-3Galβ1-4GlcNAcβ-Sp8                                                                                      | 1744 | 7  | 5 | 227 | 15 | 2 | 32  | 31  | 1 | 2 |
| 425 | Fuca1-2Galβ1-3GlcNAcβ1-2Mana1-3(Fuca1-2Galβ1-3GlcNAcβ1-2)Manβ1-4GlcNAcβ1-4(Fuca1-6)GlcNAcβ-Sp22                                             | 1772 | 5  | 5 | 199 | 10 | 2 | 35  | 109 | 1 | 2 |
| 105 | Gala1-3(Fuca1-2)Galβ1-4GlcNAc-Sp0                                                                                                           | 2000 | 11 | 6 | 119 | 32 | 1 | 32  | 32  | 1 | 2 |
| 23  | [3OSO3]Galβ1-4(Fuca1-3)[6OSO3]Glc-Sp0                                                                                                       | 1723 | 16 | 5 | 231 | 15 | 2 | 21  | 35  | 1 | 2 |
| 45  | Neu5Aca2-3[6OSO3]Galβ1-4GlcNAcβ-Sp8                                                                                                         | 1652 | 6  | 5 | 197 | 9  | 2 | 25  | 42  | 1 | 2 |
| 278 | Neu5Gca2-3Galβ1-3(Fuca1-4)GlcNAcβ-Sp0                                                                                                       | 1608 | 2  | 4 | 107 | 20 | 1 | 22  | 19  | 1 | 2 |
| 50  | Mana1-3(Mana1-6)Manβ1-4GlcNAcβ1-4GlcNAcβ-Sp13                                                                                               | 1140 | 3  | 3 | 131 | 7  | 1 | 64  | 17  | 2 | 2 |
| 83  | GalNAca1-3(Fuca1-2)Galβ1-4(Fuca1-3)GlcNAcβ-Sp0                                                                                              | 1280 | 8  | 4 | 139 | 15 | 1 | 28  | 21  | 1 | 2 |
| 386 | Galβ1-4GlcNAcβ1-2(Galβ1-4GlcNAcβ1-4)Mana1-3(Galβ1-4GlcNAcβ1-2)Manβ1-4GlcNAcβ1-4GlcNAcβ-Sp21                                                 | 1238 | 9  | 3 | 112 | 37 | 1 | 35  | 13  | 1 | 2 |
| 217 | [3OSO3]Galβ1-4(Fuca1-3)[6OSO3]GlcNAc-Sp8                                                                                                    | 1352 | 8  | 4 | 91  | 5  | 1 | 22  | 39  | 1 | 2 |
| 58  | Fuca1-2Galβ1-3GalNAca1-3Gala-Sp9                                                                                                            | 1518 | 8  | 4 | 58  | 27 | 0 | 15  | 24  | 0 | 2 |
| 334 | GalNAca1-3(Fuca1-2)Galβ1-4GlcNAcβ1-3Galβ1-4GlcNAcβ1-3Galβ1-4GlcNAcβ-Sp0                                                                     | 1284 | 18 | 4 | 88  | 24 | 1 | 15  | 79  | 0 | 2 |
| 421 | Fuca1-2Galβ1-3GlcNAcβ1-3GalNAc-Sp14                                                                                                         | 1407 | 14 | 4 | 52  | 41 | 0 | 11  | 58  | 0 | 2 |
| 228 | Neu5Aca2-3(6-O-Su)Galβ1-4(Fuca1-3)GlcNAcβ-Sp8                                                                                               | 1184 | 4  | 3 | 93  | 9  | 1 | 17  | 56  | 0 | 1 |
| 374 | Fuca1-2Galβ1-3(Fuca1-4)GlcNAcβ1-2Mana1-3(Fuca1-2Galβ1-3(Fuca1-4)GlcNAcβ1-2)Manβ1-4GlcNAcβ1-4GlcNAcβ-Sp19                                    | 1269 | 7  | 3 | 56  | 20 | 0 | 16  | 37  | 0 | 1 |
| 252 | Neu5Aca2-3Galβ1-4(Fuca1-3)GlcNAcβ-Sp0                                                                                                       | 1178 | 2  | 3 | 110 | 11 | 1 | 5   | 145 | 0 | 1 |
| 250 | Neu5Aca2-3Galβ1-4(Fuca1-3)[6OSO3]GlcNAcβ-Sp8                                                                                                | 1034 | 9  | 3 | 108 | 12 | 1 | 18  | 73  | 0 | 1 |
| 87  | GalNAca1-3(Fuca1-2)Galβ1-4Glc-Sp0                                                                                                           | 1158 | 7  | 3 | 60  | 30 | 0 | 19  | 74  | 0 | 1 |
| 85  | GalNAca1-3(Fuca1-2)Galβ1-4GlcNAcβ-Sp0                                                                                                       | 1269 | 12 | 3 | 43  | 41 | 0 | 9   | 62  | 0 | 1 |



|     |                                                                                                                       |      |     |   |     |     |   |    |     |   |   |
|-----|-----------------------------------------------------------------------------------------------------------------------|------|-----|---|-----|-----|---|----|-----|---|---|
| 62  | Fuca1-2Galβ1-3GalNAcα-Sp14                                                                                            | 912  | 30  | 3 | 98  | 44  | 1 | 28 | 57  | 1 | 1 |
| 254 | Neu5Aca2-3Galβ1-4(Fuca1-3)GlcNAcβ1-3Galβ-Sp8                                                                          | 864  | 34  | 2 | 150 | 16  | 1 | 11 | 21  | 0 | 1 |
| 368 | Galβ1-4GlcNAcβ1-2(Galβ1-4GlcNAcβ1-4)Mana1-3(Galβ1-4GlcNAcβ1-2Mana1-6)Manβ1-4GlcNAcβ1-4GlcNAc-Sp21                     | 956  | 5   | 3 | 84  | 41  | 1 | 20 | 39  | 1 | 1 |
| 452 | Galα1-3Fuca1-2Galβ1-4GlcNAcβ1-3(Galα1-3Fuca1-2Galβ1-4GlcNAcβ1-6)GalNAc-Sp14                                           | 1218 | 15  | 3 | 7   | 104 | 0 | 6  | 139 | 0 | 1 |
| 86  | GalNAcα1-3(Fuca1-2)Galβ1-4GlcNAcβ-Sp8                                                                                 | 935  | 13  | 3 | 58  | 39  | 0 | 14 | 30  | 0 | 1 |
| 280 | Neu5Gca2-3Galβ1-4(Fuca1-3)GlcNAcβ-Sp0                                                                                 | 915  | 3   | 3 | 59  | 24  | 0 | 4  | 50  | 0 | 1 |
| 371 | Galα1-3Galβ1-4(Fuca1-3)GlcNAcβ1-2Mana1-3(Galα1-3Galβ1-4(Fuca1-3)GlcNAcβ1-2Mana1-6)Manβ1-4GlcNAcβ1-4GlcNAcβ-Sp20       | 668  | 49  | 2 | 94  | 6   | 1 | 19 | 34  | 0 | 1 |
| 415 | Fuca1-2Galβ1-4(Fuca1-3)GlcNAcβ1-3GalNAcα-Sp14                                                                         | 948  | 10  | 3 | 40  | 46  | 0 | 5  | 31  | 0 | 1 |
| 449 | Galβ1-4(Fuca1-3)GlcNAcβ1-6GalNAc-Sp14                                                                                 | 719  | 20  | 2 | 59  | 23  | 0 | 22 | 51  | 1 | 1 |
| 412 | Galα1-3(Fuca1-2)Galβ1-4GlcNAcβ1-3GalNAcα-Sp14                                                                         | 879  | 8   | 2 | 22  | 93  | 0 | 10 | 68  | 0 | 1 |
| 103 | Galα1-3(Fuca1-2)Galβ1-4(Fuca1-3)GlcNAcβ-Sp0                                                                           | 813  | 14  | 2 | 38  | 23  | 0 | 8  | 82  | 0 | 1 |
| 416 | Galα1-3(Fuca1-2)Galβ1-4(Fuca1-3)GlcNAcβ1-3GalNAc-Sp14                                                                 | 807  | 18  | 2 | 19  | 38  | 0 | 9  | 43  | 0 | 1 |
| 369 | GalNAcα1-3(Fuca1-2)Galβ1-4GlcNAcβ1-2Mana1-3(GalNAcα1-3(Fuca1-2)Galβ1-4GlcNAcβ1-2Mana1-6)Manβ1-4GlcNAcβ1-4GlcNAcβ-Sp20 | 720  | 4   | 2 | 26  | 42  | 0 | 10 | 71  | 0 | 1 |
| 64  | Fuca1-2Galβ1-3GalNAcβ1-4(Neu5Aca2-3)Galβ1-4Glcβ-Sp9                                                                   | 595  | 28  | 2 | 21  | 111 | 0 | 7  | 67  | 0 | 1 |
| 355 | KDNα2-3Galβ1-4(Fuca1-3)GlcNAc-Sp0                                                                                     | 541  | 32  | 1 | 14  | 46  | 0 | 11 | 53  | 0 | 1 |
| 119 | Galα1-4Galβ1-4GlcNAcβ-Sp0                                                                                             | 515  | 16  | 1 | 27  | 37  | 0 | 7  | 137 | 0 | 1 |
| 379 | Galβ1-3GalNAcα1-3(Fuca1-2)Galβ1-4Glc-Sp0                                                                              | 525  | 21  | 1 | 5   | 125 | 0 | 9  | 67  | 0 | 1 |
| 417 | GalNAcα1-3(Fuca1-2)Galβ1-4(Fuca1-3)GlcNAcβ1-3GalNAc-Sp14                                                              | 470  | 9   | 1 | 16  | 44  | 0 | 9  | 68  | 0 | 1 |
| 373 | Galα1-3(Fuca1-2)Galβ1-3GlcNAcβ1-2Mana1-3(Galα1-3(Fuca1-2)Galβ1-3GlcNAcβ1-2Mana1-6)Manβ1-4GlcNAcβ1-4GlcNAcβ-Sp20       | 522  | 6   | 1 | 17  | 31  | 0 | 2  | 278 | 0 | 1 |
| 52  | GlcNAcβ1-2Mana1-3(GlcNAcβ1-2Mana1-6)Manβ1-4GlcNAcβ1-4GlcNAcβ-Sp13                                                     | 329  | 13  | 1 | 36  | 18  | 0 | 15 | 46  | 0 | 1 |
| 106 | Galα1-3(Fuca1-2)Galβ1-4Glcβ-Sp0                                                                                       | 383  | 59  | 1 | 29  | 54  | 0 | 10 | 48  | 0 | 1 |
| 381 | Galβ1-3GlcNAcβ1-3(Galβ1-3GlcNAcβ1-3Galβ1-4GlcNAcβ1-6)Galβ1-4Glcβ-Sp0                                                  | 347  | 7   | 1 | 24  | 54  | 0 | 14 | 37  | 0 | 0 |
| 156 | Galβ1-4GalNAcβ1-3(Fuca1-2)Galβ1-4GlcNAcβ-Sp8                                                                          | 366  | 16  | 1 | 31  | 28  | 0 | 8  | 44  | 0 | 0 |
| 370 | Galα1-3(Fuca1-2)Galβ1-4GlcNAcβ1-2Mana1-3(Galα1-3(Fuca1-2)Galβ1-4GlcNAcβ1-2Mana1-6)Manβ1-4GlcNAcβ1-4GlcNAcβ-Sp20       | 419  | 21  | 1 | 23  | 45  | 0 | 4  | 74  | 0 | 0 |
| 297 | Galβ1-3(Neu5Aca2-3Galβ1-4(Fuca1-3)GlcNAcβ1-6)GalNAcα-Sp14                                                             | 342  | 12  | 1 | 20  | 33  | 0 | 11 | 42  | 0 | 0 |
| 341 | GlcNAcα1-4Galβ1-4GlcNAcβ1-3Galβ1-4GlcNAcβ-Sp0                                                                         | 61   | 25  | 0 | 32  | 53  | 0 | 37 | 75  | 1 | 0 |
| 380 | Galβ1-3GalNAcα1-3(Fuca1-2)Galβ1-4GlcNAc-Sp0                                                                           | 436  | 10  | 1 | 8   | 60  | 0 | 3  | 160 | 0 | 0 |
| 377 | Neu5Aca2-3Galβ1-4(Fuca1-3)GlcNAcβ1-3GalNAcα-Sp14                                                                      | 263  | 28  | 1 | 14  | 18  | 0 | 20 | 62  | 1 | 0 |
| 393 | Galα1-3Galβ1-3GlcNAcβ1-2Mana1-3(Galα1-3Galβ1-3GlcNAcβ1-2Mana1-6)Manβ1-4GlcNAcβ1-4GlcNAc-Sp19                          | 368  | 4   | 1 | 11  | 25  | 0 | 7  | 134 | 0 | 0 |
| 335 | Neu5Aca2-3-Galβ1-3(Galβ1-4(Fuca1-3)GlcNAcβ1-6)GalNAc-Sp14                                                             | 328  | 30  | 1 | 16  | 45  | 0 | 8  | 88  | 0 | 0 |
| 63  | Fuca1-2Galβ1-3GalNAcβ1-4(Neu5Aca2-3)Galβ1-4Glcβ-Sp0                                                                   | 337  | 14  | 1 | 7   | 24  | 0 | 8  | 43  | 0 | 0 |
| 387 | GlcNAcβ1-2(GlcNAcβ1-4)Mana1-3(GlcNAcβ1-2Mana1-6)Manβ1-4GlcNAcβ1-4GlcNAc-Sp21                                          | 320  | 36  | 1 | 16  | 30  | 0 | 7  | 30  | 0 | 0 |
| 242 | Neu5Aca2-3Galβ1-3(Neu5Aca2-6)GalNAcα-Sp14                                                                             | 226  | 17  | 1 | 18  | 67  | 0 | 13 | 82  | 0 | 0 |
| 101 | Galα1-3(Fuca1-2)Galβ1-3GlcNAcβ-Sp0                                                                                    | 274  | 9   | 1 | 5   | 120 | 0 | 10 | 66  | 0 | 0 |
| 418 | Galβ1-4(Fuca1-3)GlcNAcβ1-2Mana1-3(Galβ1-4(Fuca1-3)GlcNAcβ1-2Mana1-6)Manβ1-4GlcNAcβ1-4(Fuca1-6)GlcNAcβ-Sp22            | 254  | 24  | 1 | 14  | 45  | 0 | 7  | 89  | 0 | 0 |
| 409 | Neu5Aca2-6Galβ1-3GlcNAcβ1-3(Galβ1-4GlcNAcβ1-6)Galβ1-4Glc-Sp21                                                         | 208  | 20  | 1 | 9   | 85  | 0 | 5  | 77  | 0 | 0 |
| 320 | Neu5Aca2-8Neu5Aca2-8Neu5Acβ-Sp8                                                                                       | 2    | 359 | 0 | 6   | 131 | 0 | 25 | 119 | 1 | 0 |
| 142 | Galβ1-3GalNAcβ1-4(Neu5Aca2-3)Galβ1-4Glcβ-Sp0                                                                          | 144  | 23  | 0 | 14  | 103 | 0 | 7  | 96  | 0 | 0 |
| 434 | Galβ1-4GlcNAcβ1-2Mana1-3(GlcNAcβ1-4)(Galβ1-                                                                           | 4    | 48  | 0 | 6   | 150 | 0 | 23 | 82  | 1 | 0 |

|     |                                                                                                                                                                                                                                     |     |      |   |    |     |   |    |     |   |   |  |
|-----|-------------------------------------------------------------------------------------------------------------------------------------------------------------------------------------------------------------------------------------|-----|------|---|----|-----|---|----|-----|---|---|--|
|     | 4GlcNAc $\beta$ 1-2)Man $\beta$ 1-4GlcNAc $\beta$ 1-4GlcNAc-Sp21                                                                                                                                                                    |     |      |   |    |     |   |    |     |   |   |  |
| 402 | Gal $\alpha$ 1-4Gal $\beta$ 1-4GlcNAc $\beta$ 1-2Man $\alpha$ 1-3(Gal $\alpha$ 1-4Gal $\beta$ 1-4GlcNAc $\beta$ 1-2Man $\alpha$ 1-6)Man $\beta$ 1-4GlcNAc $\beta$ 1-4GlcNAc $\beta$ -LVANKT                                         | 11  | 71   | 0 | 23 | 171 | 0 | 17 | 67  | 0 | 0 |  |
| 57  | Neu5Ac $\alpha$ 2-6Gal $\beta$ 1-4GlcNAc $\beta$ 1-2Man $\alpha$ 1-3(Neu5Ac $\alpha$ 2-6Gal $\beta$ 1-4GlcNAc $\beta$ 1-2Man $\alpha$ 1-6)Man $\beta$ 1-4GlcNAc $\beta$ 1-4GlcNAc $\beta$ -Sp13                                     | 179 | 13   | 0 | 8  | 45  | 0 | 3  | 50  | 0 | 0 |  |
| 413 | GalNAc $\alpha$ 1-3(Fuc $\alpha$ 1-2)Gal $\beta$ 1-4GlcNAc $\beta$ 1-3GalNAc $\alpha$ -Sp14                                                                                                                                         | 139 | 13   | 0 | 5  | 59  | 0 | 8  | 64  | 0 | 0 |  |
| 102 | Gal $\alpha$ 1-3(Fuc $\alpha$ 1-2)Gal $\beta$ 1-3GlcNAc $\beta$ -Sp8                                                                                                                                                                | 96  | 23   | 0 | 6  | 29  | 0 | 12 | 60  | 0 | 0 |  |
| 395 | Gal $\beta$ 1-4GlcNAc $\beta$ 1-2Man $\alpha$ 1-3(GlcNAc $\beta$ 1-2Man $\alpha$ 1-6)Man $\beta$ 1-4GlcNAc $\beta$ 1-4GlcNAc-Sp12                                                                                                   | 33  | 17   | 0 | 31 | 79  | 0 | 11 | 104 | 0 | 0 |  |
| 92  | GalNAc $\alpha$ 1-3Gal $\beta$ -Sp8                                                                                                                                                                                                 | 80  | 29   | 0 | 6  | 78  | 0 | 13 | 73  | 0 | 0 |  |
| 55  | Neu5Ac $\alpha$ 2-6Gal $\beta$ 1-4GlcNAc $\beta$ 1-2Man $\alpha$ 1-3(Neu5Ac $\alpha$ 2-6Gal $\beta$ 1-4GlcNAc $\beta$ 1-2Man $\alpha$ 1-6)Man $\beta$ 1-4GlcNAc $\beta$ 1-4GlcNAc $\beta$ -Sp8                                      | 82  | 11   | 0 | 3  | 97  | 0 | 12 | 64  | 0 | 0 |  |
| 124 | Gal $\beta$ 1-2Gal $\beta$ -Sp8                                                                                                                                                                                                     | 13  | 44   | 0 | 6  | 64  | 0 | 16 | 36  | 0 | 0 |  |
| 208 | Man $\alpha$ 1-6(Man $\alpha$ 1-2Man $\alpha$ 1-3)Man $\alpha$ 1-6(Man $\alpha$ 1-2Man $\alpha$ 1-3)Man $\beta$ 1-4GlcNAc $\beta$ 1-4GlcNAc $\beta$ -Sp12                                                                           | 55  | 26   | 0 | 20 | 52  | 0 | 5  | 66  | 0 | 0 |  |
| 54  | Neu5Ac $\alpha$ 2-6Gal $\beta$ 1-4GlcNAc $\beta$ 1-2Man $\alpha$ 1-3(Neu5Ac $\alpha$ 2-6Gal $\beta$ 1-4GlcNAc $\beta$ 1-2Man $\alpha$ 1-6)Man $\beta$ 1-4GlcNAc $\beta$ 1-4GlcNAc $\beta$ -N(LT)AVL                                 | 6   | 111  | 0 | 19 | 16  | 0 | 10 | 94  | 0 | 0 |  |
| 116 | Gal $\alpha$ 1-3Gal $\beta$ 1-4Glc $\beta$ -Sp0                                                                                                                                                                                     | 120 | 47   | 0 | 2  | 352 | 0 | 2  | 206 | 0 | 0 |  |
| 392 | GalNAc $\alpha$ 1-3(Fuc $\alpha$ 1-2)Gal $\beta$ 1-3GalNAc $\alpha$ 1-3(Fuc $\alpha$ 1-2)Gal $\beta$ 1-4GlcNAc $\beta$ -Sp0                                                                                                         | 113 | 38   | 0 | 7  | 30  | 0 | 1  | 246 | 0 | 0 |  |
| 244 | Neu5Ac $\alpha$ 2-3Gal $\beta$ 1-3GalNAc $\beta$ 1-3Gal $\alpha$ 1-4Gal $\beta$ 1-4Glc $\beta$ -Sp0                                                                                                                                 | 12  | 46   | 0 | 17 | 67  | 0 | 8  | 82  | 0 | 0 |  |
| 139 | Gal $\beta$ 1-3GalNAc $\alpha$ -Sp16                                                                                                                                                                                                | 9   | 71   | 0 | 4  | 98  | 0 | 13 | 15  | 0 | 0 |  |
| 454 | Neu5Ac $\alpha$ 2-8Neu5Ac $\alpha$ 2-3Gal $\beta$ 1-3GalNAc $\beta$ 1-4(Neu5Ac $\alpha$ 2-8Neu5Ac $\alpha$ 2-3)Gal $\beta$ 1-4Glc $\beta$ -sp0                                                                                      | 11  | 51   | 0 | 7  | 99  | 0 | 11 | 61  | 0 | 0 |  |
| 18  | GlcN(Gc) $\beta$ -Sp8                                                                                                                                                                                                               | 4   | 95   | 0 | 7  | 55  | 0 | 12 | 65  | 0 | 0 |  |
| 444 | [6OSO3]Gal $\beta$ 1-3[6OSO3]GlcNAc-Sp0                                                                                                                                                                                             | 6   | 70   | 0 | 7  | 51  | 0 | 11 | 30  | 0 | 0 |  |
| 210 | Man $\alpha$ 1-2Man $\alpha$ 1-2Man $\alpha$ 1-3(Man $\alpha$ 1-2Man $\alpha$ 1-3(Man $\alpha$ 1-2Man $\alpha$ 1-6)Man $\alpha$ 1-6)Man $\beta$ 1-4GlcNAc $\beta$ 1-4GlcNAc $\beta$ -Sp12                                           | 50  | 42   | 0 | 2  | 286 | 0 | 8  | 142 | 0 | 0 |  |
| 213 | Man $\alpha$ 1-6(Man $\alpha$ 1-3)Man $\alpha$ 1-6(Man $\alpha$ 1-2Man $\alpha$ 1-3)Man $\beta$ 1-4GlcNAc $\beta$ 1-4GlcNAc $\beta$ -Sp12                                                                                           | 37  | 80   | 0 | 7  | 57  | 0 | 7  | 32  | 0 | 0 |  |
| 430 | GlcNAc $\beta$ 1-2Man $\alpha$ 1-3(GlcNAc $\beta$ 1-4)(GlcNAc $\beta$ 1-2Man $\alpha$ 1-6)Man $\beta$ 1-4GlcNAc $\beta$ 1-4GlcNAc-Sp21                                                                                              | 3   | 57   | 0 | 9  | 28  | 0 | 10 | 32  | 0 | 0 |  |
| 34  | [3OSO3]Gal $\beta$ 1-4[6OSO3]GlcNAc $\beta$ -Sp8                                                                                                                                                                                    | 15  | 46   | 0 | 2  | 111 | 0 | 11 | 64  | 0 | 0 |  |
| 372 | GalNAc $\alpha$ 1-3(Fuc $\alpha$ 1-2)Gal $\beta$ 1-3GlcNAc $\beta$ 1-2Man $\alpha$ 1-3(GalNAc $\alpha$ 1-3(Fuc $\alpha$ 1-2)Gal $\beta$ 1-3GlcNAc $\beta$ 1-2Man $\alpha$ 1-6)Man $\beta$ 1-4GlcNAc $\beta$ 1-4GlcNAc $\beta$ -Sp20 | 54  | 57   | 0 | 6  | 50  | 0 | 5  | 79  | 0 | 0 |  |
| 295 | [6OSO3]Gal $\beta$ 1-4[6OSO3]GlcNAc $\beta$ -Sp0                                                                                                                                                                                    | 2   | 120  | 0 | 7  | 66  | 0 | 11 | 118 | 0 | 0 |  |
| 349 | Gal $\beta$ 1-4GlcNAc $\beta$ 1-2Man $\alpha$ 1-3(Man $\alpha$ 1-6)Man $\beta$ 1-4GlcNAc $\beta$ 1-4GlcNAc $\beta$ -Sp12                                                                                                            | 34  | 44   | 0 | 5  | 76  | 0 | 7  | 77  | 0 | 0 |  |
| 110 | Gal $\alpha$ 1-3GalNAc $\alpha$ -Sp8                                                                                                                                                                                                | 5   | 92   | 0 | 3  | 114 | 0 | 11 | 77  | 0 | 0 |  |
| 36  | [3OSO3]Gal $\beta$ 1-4GlcNAc $\beta$ -Sp8                                                                                                                                                                                           | 20  | 30   | 0 | 8  | 141 | 0 | 8  | 27  | 0 | 0 |  |
| 394 | Gal $\alpha$ 1-3Gal $\beta$ 1-3(Fuc $\alpha$ 1-4)GlcNAc $\beta$ 1-2Man $\alpha$ 1-3(Gal $\alpha$ 1-3Gal $\beta$ 1-3(Fuc $\alpha$ 1-4)GlcNAc $\beta$ 1-2Man $\alpha$ 1-6)Man $\beta$ 1-4GlcNAc $\beta$ 1-4GlcNAc-Sp19                | 54  | 79   | 0 | 8  | 60  | 0 | 4  | 87  | 0 | 0 |  |
| 265 | Neu5Ac $\alpha$ 2-6Gal $\beta$ 1-4[6OSO3]GlcNAc $\beta$ -Sp8                                                                                                                                                                        | 22  | 48   | 0 | 7  | 123 | 0 | 8  | 85  | 0 | 0 |  |
| 293 | Neu5Ac $\alpha$ 2-3Gal $\beta$ 1-4GlcNAc $\beta$ 1-3Gal $\beta$ 1-3GlcNAc $\beta$ -Sp0                                                                                                                                              | 10  | 28   | 0 | 7  | 72  | 0 | 9  | 40  | 0 | 0 |  |
| 185 | GlcNAc $\beta$ 1-4Gal $\beta$ 1-4GlcNAc $\beta$ -Sp8                                                                                                                                                                                | 9   | 73   | 0 | 3  | 42  | 0 | 10 | 70  | 0 | 0 |  |
| 282 | Neu5Gc $\alpha$ 2-3Gal $\beta$ 1-4Glc $\beta$ -Sp0                                                                                                                                                                                  | 3   | 105  | 0 | 13 | 104 | 0 | 8  | 63  | 0 | 0 |  |
| 296 | 6-H2PO3Glc $\beta$ -Sp10                                                                                                                                                                                                            | 3   | 136  | 0 | 1  | 61  | 0 | 11 | 15  | 0 | 0 |  |
| 274 | Neu5Ac $\alpha$ 2-8Neu5Ac $\alpha$ 2-3Gal $\beta$ 1-4Glc $\beta$ -Sp0                                                                                                                                                               | 3   | 139  | 0 | 6  | 11  | 0 | 10 | 19  | 0 | 0 |  |
| 321 | Neu5Gc $\beta$ 2-6Gal $\beta$ 1-4GlcNAc-Sp8                                                                                                                                                                                         | 10  | 57   | 0 | 7  | 110 | 0 | 9  | 35  | 0 | 0 |  |
| 4   | GalNAc $\alpha$ -Sp8                                                                                                                                                                                                                | 4   | 78   | 0 | 13 | 59  | 0 | 7  | 11  | 0 | 0 |  |
| 47  | [9NAc]Neu5Ac $\alpha$ -Sp8                                                                                                                                                                                                          | -1  | -613 | 0 | 3  | 98  | 0 | 11 | 18  | 0 | 0 |  |
| 233 | Neu5Ac $\alpha$ 2-3(Neu5Ac $\alpha$ 2-6)GalNAc $\alpha$ -Sp8                                                                                                                                                                        | 7   | 83   | 0 | 2  | 293 | 0 | 10 | 86  | 0 | 0 |  |
| 257 | Neu5Ac $\alpha$ 2-3Gal $\beta$ 1-4GlcNAc $\beta$ -Sp0                                                                                                                                                                               | 6   | 68   | 0 | 6  | 81  | 0 | 9  | 16  | 0 | 0 |  |
| 443 | [6OSO3]Gal $\beta$ 1-3GlcNAc $\beta$ -Sp0                                                                                                                                                                                           | 5   | 168  | 0 | 2  | 160 | 0 | 10 | 135 | 0 | 0 |  |

|     |                                                                                                                                   |    |      |   |    |      |   |    |     |   |   |
|-----|-----------------------------------------------------------------------------------------------------------------------------------|----|------|---|----|------|---|----|-----|---|---|
| 146 | Galβ1-3GlcNAcβ1-3Galβ1-4Glcβ-Sp10                                                                                                 | 65 | 59   | 0 | 9  | 19   | 0 | 2  | 77  | 0 | 0 |
| 88  | GlcNAcβ1-3Galβ1-3GalNAcα-Sp8                                                                                                      | 16 | 42   | 0 | 4  | 113  | 0 | 9  | 86  | 0 | 0 |
| 222 | Neu5Acα2-3Galβ1-3GalNAcα-Sp14                                                                                                     | 2  | 416  | 0 | 4  | 37   | 0 | 10 | 35  | 0 | 0 |
| 442 | GalNAcβ1-6GalNAcβ-Sp8                                                                                                             | 5  | 80   | 0 | 6  | 39   | 0 | 9  | 86  | 0 | 0 |
| 82  | GalNAcα1-3(Fuca1-2)Galβ1-3GlcNAcβ-Sp0                                                                                             | 12 | 37   | 0 | 5  | 24   | 0 | 8  | 57  | 0 | 0 |
| 303 | Galβ1-4GlcNAcβ1-6Galβ1-4GlcNAcβ-Sp0                                                                                               | 2  | 246  | 0 | 2  | 288  | 0 | 10 | 43  | 0 | 0 |
| 38  | [4OSO3][6OSO3]Galβ1-4GlcNAcβ-Sp0                                                                                                  | 8  | 168  | 0 | 9  | 36   | 0 | 7  | 127 | 0 | 0 |
| 263 | Neu5Acα2-6GalNAcα-Sp8                                                                                                             | 15 | 43   | 0 | 9  | 55   | 0 | 7  | 66  | 0 | 0 |
| 391 | Neu5Acα2-3(GalNAcβ1-4)Galβ1-4GlcNAcβ1-3GalNAcα-Sp14                                                                               | 6  | 128  | 0 | 7  | 166  | 0 | 8  | 96  | 0 | 0 |
| 312 | Manα1-6(Manα1-3)Manα1-6(Manα1-3)Manβ-Sp10                                                                                         | 5  | 89   | 0 | 15 | 115  | 0 | 6  | 117 | 0 | 0 |
| 147 | Galβ1-3GlcNAcβ-Sp0                                                                                                                | 3  | 130  | 0 | 6  | 174  | 0 | 9  | 34  | 0 | 0 |
| 212 | Manα1-3(Manα1-2Manα1-2Manα1-6)Manα-Sp9                                                                                            | 8  | 48   | 0 | 7  | 77   | 0 | 8  | 42  | 0 | 0 |
| 281 | Neu5Gca2-3Galβ1-4GlcNAcβ-Sp0                                                                                                      | 14 | 101  | 0 | 2  | 157  | 0 | 8  | 59  | 0 | 0 |
| 267 | Neu5Acα2-6Galβ1-4GlcNAcβ-Sp8                                                                                                      | 20 | 32   | 0 | 8  | 84   | 0 | 6  | 63  | 0 | 0 |
| 348 | Galβ1-4GlcNAcβ1-2Manα1-6Manβ1-4GlcNAcβ1-4GlcNAc-Sp12                                                                              | 9  | 59   | 0 | 3  | 210  | 0 | 8  | 17  | 0 | 0 |
| 29  | [3OSO3]Galβ1-3GlcNAcβ-Sp0                                                                                                         | 6  | 49   | 0 | 9  | 64   | 0 | 7  | 49  | 0 | 0 |
| 283 | Neu5Gca2-6GalNAcα-Sp0                                                                                                             | 10 | 65   | 0 | 1  | 163  | 0 | 9  | 66  | 0 | 0 |
| 53  | Galβ1-4GlcNAcβ1-2Manα1-3(Galβ1-4GlcNAcβ1-2Manα1-6)Manβ1-4GlcNAcβ1-4GlcNAcβ-Sp12                                                   | 2  | 89   | 0 | 6  | 104  | 0 | 8  | 41  | 0 | 0 |
| 196 | Glcβ1-4Glcβ-Sp8                                                                                                                   | 10 | 61   | 0 | 12 | 138  | 0 | 5  | 53  | 0 | 0 |
| 261 | Neu5Acα2-3Galβ1-4Glcβ-Sp0                                                                                                         | 11 | 39   | 0 | 6  | 65   | 0 | 7  | 137 | 0 | 0 |
| 165 | Galβ1-3(Galβ1-4GlcNAcβ1-6)GalNAcα-Sp8                                                                                             | 10 | 129  | 0 | 10 | 54   | 0 | 6  | 33  | 0 | 0 |
| 37  | [3OSO3]Galβ-Sp8                                                                                                                   | 5  | 148  | 0 | 10 | 22   | 0 | 6  | 64  | 0 | 0 |
| 248 | Neu5Acα2-3Galβ1-3GlcNAcβ-Sp8                                                                                                      | 11 | 30   | 0 | 8  | 64   | 0 | 6  | 100 | 0 | 0 |
| 96  | GalNAcβ1-3Galα1-4Galβ1-4GlcNAcβ-Sp0                                                                                               | 6  | 70   | 0 | 14 | 108  | 0 | 5  | 93  | 0 | 0 |
| 376 | Neu5Acα2-6Galβ1-4GlcNAcβ1-3GalNAc-Sp14                                                                                            | 15 | 43   | 0 | 7  | 64   | 0 | 6  | 97  | 0 | 0 |
| 304 | GalNAcβ1-3Galβ-Sp8                                                                                                                | 3  | 51   | 0 | 6  | 138  | 0 | 8  | 70  | 0 | 0 |
| 145 | Galβ1-3GlcNAcβ1-3Galβ1-4GlcNAcβ-Sp0                                                                                               | 5  | 97   | 0 | 7  | 17   | 0 | 7  | 30  | 0 | 0 |
| 396 | GlcNAcβ1-2Manα1-3(Galβ1-4GlcNAcβ1-2Manα1-6)Manβ1-4GlcNAcβ1-4GlcNAc-Sp12                                                           | 7  | 20   | 0 | 5  | 73   | 0 | 7  | 128 | 0 | 0 |
| 19  | Galβ1-4GlcNAcβ1-3(Galβ1-4GlcNAcβ1-6)GalNAcα-Sp8                                                                                   | 0  | 738  | 0 | 9  | 81   | 0 | 7  | 86  | 0 | 0 |
| 437 | Galβ1-4GlcNAcβ1-4(Galβ1-4GlcNAcβ1-2)Manα1-3(GlcNAcβ1-4)(Galβ1-4GlcNAcβ1-6(Galβ1-4-GlcNAcβ1-2)Manα1-6)Manβ1-4GlcNAcβ1-4GlcNAc-Sp21 | 5  | 82   | 0 | 8  | 34   | 0 | 6  | 61  | 0 | 0 |
| 291 | Galβ1-4GlcNAcβ1-3Galβ1-3GlcNAcβ-Sp0                                                                                               | 9  | 52   | 0 | 6  | 58   | 0 | 6  | 98  | 0 | 0 |
| 319 | Neu5Acα2-8Neu5Acβ-Sp17                                                                                                            | 7  | 90   | 0 | 1  | 420  | 0 | 8  | 185 | 0 | 0 |
| 407 | GlcNAcβ1-6(GlcNAcβ1-3)GalNAcα-Sp14                                                                                                | 6  | 88   | 0 | 2  | 130  | 0 | 8  | 43  | 0 | 0 |
| 22  | [3OSO3][6OSO3]Galβ1-4GlcNAcβ-Sp0                                                                                                  | -1 | -430 | 0 | 0  | -478 | 0 | 9  | 43  | 0 | 0 |
| 99  | GalNAcβ1-4GlcNAcβ-Sp8                                                                                                             | 8  | 18   | 0 | 4  | 128  | 0 | 7  | 77  | 0 | 0 |
| 463 | Galα1-3(Fuca1-2)Galβ1-3GalNAcβ-Sp8                                                                                                | 12 | 54   | 0 | 14 | 103  | 0 | 4  | 205 | 0 | 0 |
| 365 | Neu5Acα2-6GlcNAcβ1-4GlcNAc-Sp21                                                                                                   | 3  | 151  | 0 | 6  | 124  | 0 | 7  | 38  | 0 | 0 |
| 302 | Galβ1-4GlcNAcα1-6Galβ1-4GlcNAcβ-Sp0                                                                                               | 12 | 42   | 0 | 7  | 90   | 0 | 6  | 159 | 0 | 0 |
| 98  | GalNAcβ1-4GlcNAcβ-Sp0                                                                                                             | 3  | 138  | 0 | 7  | 94   | 0 | 6  | 68  | 0 | 0 |
| 438 | Galα1-3Galβ1-4Glc-Sp10                                                                                                            | -1 | -122 | 0 | 6  | 100  | 0 | 7  | 53  | 0 | 0 |
| 259 | Neu5Acα2-3Galβ1-4GlcNAcβ1-3Galβ1-4GlcNAcβ-Sp0                                                                                     | 8  | 44   | 0 | 9  | 83   | 0 | 5  | 91  | 0 | 0 |
| 311 | Manα1-6Manβ-Sp10                                                                                                                  | 1  | 494  | 0 | 4  | 119  | 0 | 8  | 75  | 0 | 0 |
| 160 | Galβ1-4GlcNAcβ1-3Galβ1-4GlcNAcβ1-3Galβ1-4GlcNAcβ-Sp0                                                                              | 9  | 23   | 0 | 2  | 107  | 0 | 7  | 74  | 0 | 0 |
| 173 | GlcNAcβ1-2Galβ1-3GalNAcα-Sp8                                                                                                      | 3  | 68   | 0 | 9  | 115  | 0 | 6  | 122 | 0 | 0 |
| 211 | Manα1-3(Manα1-6)Manα-Sp9                                                                                                          | 1  | 189  | 0 | 7  | 22   | 0 | 7  | 22  | 0 | 0 |
| 316 | Neu5Acα2-3Galβ1-4GlcNAcβ1-2Manα1-3(Neu5Acα2-6Galβ1-4GlcNAcβ1-2Manα1-6)Manβ1-4GlcNAcβ1-4GlcNAcβ-Sp12                               | 4  | 59   | 0 | 4  | 90   | 0 | 7  | 73  | 0 | 0 |

|     |                                                                                                                |    |     |   |    |      |   |   |     |   |   |
|-----|----------------------------------------------------------------------------------------------------------------|----|-----|---|----|------|---|---|-----|---|---|
| 347 | Galβ1-4GlcNAcβ1-2Manα1-3Manβ1-4GlcNAcβ1-4GlcNAc-Sp12                                                           | 28 | 54  | 0 | 8  | 70   | 0 | 3 | 105 | 0 | 0 |
| 397 | Neu5Acα2-3Galβ1-3GlcNAcβ1-3GalNAcα-Sp14                                                                        | 9  | 114 | 0 | -1 | -349 | 0 | 8 | 95  | 0 | 0 |
| 30  | [3OSO3]Galβ1-3GlcNAcβ-Sp8                                                                                      | 5  | 55  | 0 | 10 | 97   | 0 | 5 | 168 | 0 | 0 |
| 401 | Galα1-4Galβ1-3GlcNAcβ1-2Manα1-3(Galα1-4Galβ1-3GlcNAcβ1-2Manα1-6)Manβ1-4GlcNAcβ1-4GlcNAcβ-Sp19                  | 15 | 53  | 0 | 4  | 56   | 0 | 6 | 49  | 0 | 0 |
| 166 | Galβ1-3(Galβ1-4GlcNAcβ1-6)GalNAc-Sp14                                                                          | 1  | 394 | 0 | 3  | 169  | 0 | 8 | 100 | 0 | 0 |
| 343 | Manα1-3(Neu5Acα2-6Galβ1-4GlcNAcβ1-2Manα1-6)Manβ1-4GlcNAcβ1-4GlcNAc-Sp12                                        | 10 | 106 | 0 | 7  | 75   | 0 | 5 | 80  | 0 | 0 |
| 247 | Neu5Acα2-3Galβ1-3GlcNAcβ-Sp0                                                                                   | 7  | 84  | 0 | 4  | 200  | 0 | 6 | 102 | 0 | 0 |
| 256 | Neu5Acα2-3Galβ1-4GlcNAcβ1-3Galβ1-4GlcNAcβ1-3Galβ1-4GlcNAcβ-Sp0                                                 | 6  | 37  | 0 | 6  | 156  | 0 | 6 | 35  | 0 | 0 |
| 94  | GalNAcβ1-3GalNAcα-Sp8                                                                                          | 3  | 50  | 0 | 13 | 43   | 0 | 4 | 87  | 0 | 0 |
| 1   | Galα-Sp8                                                                                                       | 8  | 29  | 0 | 0  | 626  | 0 | 8 | 65  | 0 | 0 |
| 284 | Neu5Gca2-6Galβ1-4GlcNAcβ-Sp0                                                                                   | 10 | 49  | 0 | 9  | 62   | 0 | 4 | 64  | 0 | 0 |
| 344 | Neu5Acα2-6Galβ1-4GlcNAcβ1-2Manα1-3(Manα1-6)Manβ1-4GlcNAcβ1-4GlcNAc-Sp12                                        | 4  | 114 | 0 | 4  | 181  | 0 | 7 | 56  | 0 | 0 |
| 411 | Neu5Acα2-3Galβ1-3GalNAcβ1-4(Neu5Acα2-8Neu5Acα2-3)Galβ1-4Glcβ-Sp0                                               | 9  | 79  | 0 | 11 | 30   | 0 | 4 | 62  | 0 | 0 |
| 235 | Neu5Acα2-3GalNAcβ1-4GlcNAcβ-Sp0                                                                                | -3 | -30 | 0 | 3  | 66   | 0 | 8 | 57  | 0 | 0 |
| 424 | Galα1-3Galβ1-3GlcNAcβ1-3GalNAc-Sp14                                                                            | 23 | 164 | 0 | 3  | 121  | 0 | 5 | 37  | 0 | 0 |
| 189 | GlcNAcβ1-6(Galβ1-3)GalNAcα-Sp8                                                                                 | 4  | 107 | 0 | 1  | 638  | 0 | 8 | 43  | 0 | 0 |
| 111 | Galα1-3GalNAcα-Sp16                                                                                            | 3  | 48  | 0 | 1  | 514  | 0 | 8 | 159 | 0 | 0 |
| 240 | Neu5Acα2-3Galβ1-3[6OSO3]GalNAcα-Sp8                                                                            | 8  | 51  | 0 | 7  | 52   | 0 | 5 | 38  | 0 | 0 |
| 336 | GlcNAcα1-4Galβ1-4GlcNAcβ1-3Galβ1-4GlcNAcβ1-3Galβ1-4GlcNAcβ-Sp0                                                 | 5  | 28  | 0 | -2 | -180 | 0 | 8 | 76  | 0 | 0 |
| 132 | Galβ1-3(GlcNAcβ1-6)GalNAc-Sp14                                                                                 | 6  | 132 | 0 | 6  | 86   | 0 | 6 | 108 | 0 | 0 |
| 239 | Neu5Acα2-3Galβ1-3(Neu5Acα2-3Galβ1-4)GlcNAcβ-Sp8                                                                | 10 | 26  | 0 | 19 | 53   | 0 | 1 | 226 | 0 | 0 |
| 10  | Neu5Acα-Sp11                                                                                                   | 3  | 196 | 0 | 3  | 59   | 0 | 7 | 22  | 0 | 0 |
| 8   | Rhaα-Sp8                                                                                                       | 15 | 42  | 0 | 17 | 106  | 0 | 1 | 83  | 0 | 0 |
| 234 | Neu5Acα2-3GalNAcα-Sp8                                                                                          | 5  | 36  | 0 | 3  | 143  | 0 | 6 | 43  | 0 | 0 |
| 436 | Galβ1-4GlcNAcβ1-2Manα1-3(GlcNAcβ1-4)(Galβ1-4GlcNAcβ1-6)(Galβ1-4GlcNAcβ1-2)Manα1-6)Manβ1-4GlcNAcβ1-4GlcNAc-Sp21 | 6  | 71  | 0 | 1  | 544  | 0 | 7 | 54  | 0 | 0 |
| 330 | Neu5Acα2-6Galβ1-4GlcNAcβ1-3Galβ1-4GlcNAcβ1-3Galβ1-4GlcNAcβ-Sp0                                                 | 3  | 232 | 0 | 7  | 13   | 0 | 6 | 35  | 0 | 0 |
| 378 | (GalNAcβ1-4GlcNAcβ1-2Manα1-6)GalNAcβ1-4GlcNAcβ1-2Manα1-3Manβ1-4GlcNAcβ1-4GlcNAc-Sp12                           | 13 | 61  | 0 | 7  | 80   | 0 | 4 | 80  | 0 | 0 |
| 100 | Galα1-2Galβ-Sp8                                                                                                | 3  | 69  | 0 | 8  | 188  | 0 | 5 | 181 | 0 | 0 |
| 39  | [4OSO3]Galβ1-4GlcNAcβ-Sp8                                                                                      | 6  | 63  | 0 | 3  | 98   | 0 | 6 | 83  | 0 | 0 |
| 163 | Galβ1-4GlcNAcβ1-3Galβ1-4Glcβ-Sp8                                                                               | 11 | 44  | 0 | 9  | 63   | 0 | 4 | 42  | 0 | 0 |
| 143 | Galβ1-3GalNAcβ1-4Galβ1-4Glcβ-Sp8                                                                               | 10 | 99  | 0 | 5  | 23   | 0 | 5 | 34  | 0 | 0 |
| 366 | Neu5Acα2-6GlcNAcβ1-4GlcNAcβ1-4GlcNAc-Sp21                                                                      | 2  | 132 | 0 | 3  | 68   | 0 | 6 | 28  | 0 | 0 |
| 123 | Galα1-6Glcβ-Sp8                                                                                                | 12 | 57  | 0 | 1  | 229  | 0 | 6 | 102 | 0 | 0 |
| 51  | GlcNAcβ1-2Manα1-3(GlcNAcβ1-2Manα1-6)Manβ1-4GlcNAcβ1-4GlcNAcβ-Sp12                                              | 5  | 17  | 0 | 3  | 143  | 0 | 6 | 76  | 0 | 0 |
| 362 | Galα1-3Galβ1-4GlcNAcβ1-2Manα1-3(Galα1-3Galβ1-4GlcNAcβ1-2Manα1-6)Manβ1-4GlcNAcβ1-4GlcNAcβ-Sp20                  | 4  | 75  | 0 | 3  | 195  | 0 | 6 | 64  | 0 | 0 |
| 224 | Neu5Acα2-8Neu5Acα2-8Neu5Acα2-3(GalNAcβ1-4)Galβ1-4Glcβ-Sp0                                                      | 1  | 172 | 0 | 9  | 48   | 0 | 5 | 161 | 0 | 0 |
| 324 | Neu5Acα2-6Galβ1-4GlcNAcβ1-2Manα1-3(Neu5Acα2-3Galβ1-4GlcNAcβ1-2Manα1-6)Manβ1-4GlcNAcβ1-4GlcNAcβ-Sp12            | 9  | 31  | 0 | 8  | 55   | 0 | 4 | 151 | 0 | 0 |
| 13  | Glcβ-Sp8                                                                                                       | 10 | 52  | 0 | 7  | 109  | 0 | 4 | 73  | 0 | 0 |
| 184 | GlcNAcβ1-4(GlcNAcβ1-6)GalNAcα-Sp8                                                                              | 4  | 64  | 0 | 5  | 63   | 0 | 5 | 95  | 0 | 0 |
| 461 | Galβ1-4GlcNAcβ-(OCH2CH2)6NH2                                                                                   | 13 | 47  | 0 | 5  | 40   | 0 | 5 | 65  | 0 | 0 |
| 354 | [6OSO3]GlcNAcβ1-3Galβ1-4GlcNAcβ-Sp0                                                                            | 10 | 40  | 0 | 13 | 71   | 0 | 2 | 100 | 0 | 0 |
| 175 | GlcNAcβ1-3(GlcNAcβ1-6)Galβ1-4GlcNAcβ-Sp8                                                                       | 8  | 72  | 0 | 6  | 45   | 0 | 5 | 69  | 0 | 0 |

|     |                                                                                                       |    |      |   |    |      |   |   |     |   |   |
|-----|-------------------------------------------------------------------------------------------------------|----|------|---|----|------|---|---|-----|---|---|
| 301 | Galβ1-4GlcNAcβ1-3(GlcNAcβ1-6)Galβ1-4GlcNAc-Sp0                                                        | 1  | 439  | 0 | -1 | -217 | 0 | 7 | 87  | 0 | 0 |
| 431 | GlcNAcβ1-4(GlcNAcβ1-2)Manα1-3(GlcNAcβ1-4)(GlcNAcβ1-2)Manα1-6)Manβ1-4GlcNAcβ1-4GlcNAc-Sp21             | 4  | 79   | 0 | 4  | 120  | 0 | 6 | 66  | 0 | 0 |
| 432 | GlcNAcβ1-2)Manα1-3(GlcNAcβ1-4)(GlcNAcβ1-6(GlcNAcβ1-2)Manα1-6)Manβ1-4GlcNAcβ1-4GlcNAc-Sp21             | 9  | 17   | 0 | 13 | 63   | 0 | 2 | 135 | 0 | 0 |
| 227 | Neu5Acα2-8Neu5Acα2-8Neu5Acα-Sp8                                                                       | 10 | 63   | 0 | 13 | 7    | 0 | 2 | 185 | 0 | 0 |
| 21  | [3OSO3][6OSO3]Galβ1-4[6OSO3]GlcNAcβ-Sp0                                                               | 10 | 38   | 0 | 9  | 74   | 0 | 3 | 153 | 0 | 0 |
| 249 | Neu5Acα2-3Galβ1-4[6OSO3]GlcNAcβ-Sp8                                                                   | 8  | 139  | 0 | 8  | 93   | 0 | 4 | 219 | 0 | 0 |
| 322 | Galβ1-3GlcNAcβ1-2)Manα1-3(Galβ1-3GlcNAcβ1-2)Manα1-6)Manβ1-4GlcNAcβ1-4GlcNAcβ-Sp19                     | 7  | 34   | 0 | 5  | 103  | 0 | 5 | 57  | 0 | 0 |
| 131 | Galβ1-3(GlcNAcβ1-6)GalNAcα-Sp8                                                                        | 7  | 133  | 0 | 8  | 52   | 0 | 4 | 47  | 0 | 0 |
| 137 | Galβ1-3GalNAcα-Sp8                                                                                    | 5  | 93   | 0 | 8  | 62   | 0 | 4 | 125 | 0 | 0 |
| 114 | Galα1-3Galβ1-3GlcNAcβ-Sp0                                                                             | 14 | 41   | 0 | 8  | 66   | 0 | 3 | 85  | 0 | 0 |
| 271 | Neu5Acα2-6Galβ1-4Glcβ-Sp8                                                                             | 3  | 113  | 0 | 6  | 44   | 0 | 5 | 36  | 0 | 0 |
| 43  | [6OSO3]Galβ1-4GlcNAcβ-Sp8                                                                             | -1 | -583 | 0 | 1  | 1370 | 0 | 7 | 61  | 0 | 0 |
| 187 | GlcNAcβ1-4GlcNAcβ1-4GlcNAcβ1-4GlcNAcβ1-4GlcNAcβ-Sp8                                                   | 2  | 306  | 0 | 6  | 20   | 0 | 5 | 91  | 0 | 0 |
| 193 | Glcα1-4Glcβ-Sp8                                                                                       | 9  | 52   | 0 | 4  | 57   | 0 | 5 | 55  | 0 | 0 |
| 204 | KDNα2-3Galβ1-4GlcNAcβ-Sp0                                                                             | 8  | 56   | 0 | 5  | 71   | 0 | 4 | 99  | 0 | 0 |
| 358 | KDNα2-3Galβ1-3GalNAcα-Sp14                                                                            | 7  | 70   | 0 | 5  | 131  | 0 | 5 | 32  | 0 | 0 |
| 286 | Galβ1-3(Neu5Acα2-3Galβ1-4GlcNAcβ1-6)GalNAcα-Sp14                                                      | 5  | 16   | 0 | 4  | 136  | 0 | 5 | 118 | 0 | 0 |
| 161 | Galβ1-4GlcNAcβ1-3Galβ1-4GlcNAcβ-Sp0                                                                   | 3  | 146  | 0 | 6  | 105  | 0 | 4 | 91  | 0 | 0 |
| 269 | Neu5Acα2-6Galβ1-4GlcNAcβ1-3Galβ1-4GlcNAcβ-Sp0                                                         | 8  | 62   | 0 | 5  | 81   | 0 | 4 | 85  | 0 | 0 |
| 327 | Neu5Ac(9Ac)α2-3Galβ1-3GlcNAcβ-Sp0                                                                     | 11 | 103  | 0 | 7  | 108  | 0 | 3 | 82  | 0 | 0 |
| 135 | Galβ1-3(Neu5Acβ2-6)GalNAcα-Sp8                                                                        | 10 | 113  | 0 | 2  | 175  | 0 | 5 | 53  | 0 | 0 |
| 174 | GlcNAcβ1-3(GlcNAcβ1-6)GalNAcα-Sp8                                                                     | 3  | 133  | 0 | 4  | 54   | 0 | 5 | 22  | 0 | 0 |
| 403 | Galα1-3Galβ1-4GlcNAcβ1-3GalNAcα-Sp14                                                                  | 4  | 78   | 0 | 5  | 107  | 0 | 5 | 126 | 0 | 0 |
| 200 | GlcAβ-Sp8                                                                                             | 4  | 40   | 0 | 1  | 439  | 0 | 6 | 10  | 0 | 0 |
| 221 | Neu5Acα2-3Galβ1-3GalNAcα-Sp8                                                                          | 3  | 73   | 0 | 9  | 78   | 0 | 4 | 155 | 0 | 0 |
| 406 | GalNAcβ1-3Galα1-6Galβ1-4Glcβ-Sp8                                                                      | 3  | 144  | 0 | 4  | 152  | 0 | 5 | 75  | 0 | 0 |
| 462 | Galα1-3(Fuca1-2)Galβ1-3GalNAcα-Sp8                                                                    | 6  | 78   | 0 | 1  | 373  | 0 | 6 | 44  | 0 | 0 |
| 342 | GlcNAcα1-4Galβ1-3GalNAc-Sp14                                                                          | 14 | 31   | 0 | 3  | 138  | 0 | 4 | 117 | 0 | 0 |
| 216 | Neu5Acα2-3Galβ1-4GlcNAcβ1-3Galβ1-4(Fuca1-3)GlcNAc-Sp0                                                 | 4  | 71   | 0 | 4  | 13   | 0 | 4 | 133 | 0 | 0 |
| 332 | GalNAcβ1-3Galα1-4Galβ1-4GlcNAcβ1-3Galβ1-4Glcβ-Sp0                                                     | 4  | 235  | 0 | 10 | 70   | 0 | 3 | 105 | 0 | 0 |
| 298 | Galβ1-3Galβ1-4GlcNAcβ-Sp8                                                                             | 9  | 87   | 0 | 9  | 46   | 0 | 3 | 105 | 0 | 0 |
| 307 | GlcNAcβ1-3Man-Sp10                                                                                    | 11 | 24   | 0 | 5  | 28   | 0 | 3 | 68  | 0 | 0 |
| 158 | Galβ1-4GlcNAcβ1-3GalNAcα-Sp14                                                                         | 2  | 107  | 0 | 9  | 24   | 0 | 3 | 182 | 0 | 0 |
| 314 | Manα1-2)Manα1-2)Manα1-3(Manα1-2)Manα1-6(Manα1-2)Manα1-3)Manα1-6)Manα-Sp9                              | -1 | -240 | 0 | 4  | 58   | 0 | 5 | 53  | 0 | 0 |
| 292 | Neu5Acα2-3Galβ1-3GlcNAcβ1-3Galβ1-3GlcNAcβ-Sp0                                                         | 13 | 63   | 0 | 4  | 183  | 0 | 3 | 88  | 0 | 0 |
| 190 | GlcNAcβ1-6GalNAcα-Sp8                                                                                 | 8  | 11   | 0 | 3  | 71   | 0 | 4 | 40  | 0 | 0 |
| 195 | Glcα1-6Glcα1-6Glcβ-Sp8                                                                                | 6  | 88   | 0 | 2  | 117  | 0 | 5 | 94  | 0 | 0 |
| 214 | Manα1-6(Manα1-3)Manα1-6(Manα1-3)Manβ1-4GlcNAcβ1-4GlcNAcβ-Sp12                                         | 37 | 58   | 0 | 3  | 129  | 0 | 1 | 106 | 0 | 0 |
| 258 | Neu5Acα2-3Galβ1-4GlcNAcβ-Sp8                                                                          | 4  | 146  | 0 | 15 | 67   | 0 | 1 | 246 | 0 | 0 |
| 202 | GlcAβ1-6Galβ-Sp8                                                                                      | 17 | 38   | 0 | 1  | 249  | 0 | 4 | 98  | 0 | 0 |
| 120 | Galα1-4Galβ1-4GlcNAcβ-Sp8                                                                             | 5  | 134  | 0 | 10 | 49   | 0 | 2 | 197 | 0 | 0 |
| 414 | GalNAcα1-3GalNAcβ1-3Galα1-4Galβ1-4Glcβ-Sp0                                                            | 3  | 68   | 0 | 7  | 109  | 0 | 4 | 70  | 0 | 0 |
| 375 | Neu5Acα2-3Galβ1-4GlcNAcβ1-3GalNAc-Sp14                                                                | -2 | -71  | 0 | 18 | 50   | 0 | 1 | 866 | 0 | 0 |
| 197 | Glcβ1-6Glcβ-Sp8                                                                                       | 4  | 52   | 0 | 9  | 41   | 0 | 2 | 166 | 0 | 0 |
| 56  | Neu5Acα2-6Galβ1-4GlcNAcβ1-2)Manα1-3(Neu5Acα2-6Galβ1-4GlcNAcβ1-2)Manα1-6)Manβ1-4GlcNAcβ1-4GlcNAcβ-Sp12 | 1  | 172  | 0 | 6  | 81   | 0 | 4 | 84  | 0 | 0 |

|     |                                                                     |    |      |   |    |      |   |   |     |   |   |
|-----|---------------------------------------------------------------------|----|------|---|----|------|---|---|-----|---|---|
| 305 | GlcAβ1-3GlcNAcβ-Sp8                                                 | 21 | 60   | 0 | 4  | 57   | 0 | 2 | 113 | 0 | 0 |
| 294 | [3OSO3][4OSO3]Galβ1-4GlcNAcβ-Sp0                                    | 6  | 31   | 0 | 1  | 237  | 0 | 5 | 81  | 0 | 0 |
| 144 | Galβ1-3Galβ-Sp8                                                     | 6  | 102  | 0 | 4  | 78   | 0 | 4 | 44  | 0 | 0 |
| 229 | Neu5Acα2-3(GalNAcβ1-4)Galβ1-4GlcNAcβ-Sp0                            | 7  | 42   | 0 | 4  | 43   | 0 | 4 | 44  | 0 | 0 |
| 223 | Neu5Acα2-8Neu5Acα2-8Neu5Acα2-8Neu5Acα2-3(GalNAcβ1-4)Galβ1-4Glcβ-Sp0 | 8  | 58   | 0 | 3  | 111  | 0 | 4 | 163 | 0 | 0 |
| 357 | KDNα2-3Galβ1-4Glc-Sp0                                               | 7  | 78   | 0 | 9  | 41   | 0 | 2 | 267 | 0 | 0 |
| 346 | Neu5Acα2-6Galβ1-4GlcNAcβ1-2Manα1-3Manβ1-4GlcNAcβ1-4GlcNAc-Sp12      | 15 | 32   | 0 | 3  | 167  | 0 | 3 | 93  | 0 | 0 |
| 148 | Galβ1-3GlcNAcβ-Sp8                                                  | 8  | 33   | 0 | 7  | 75   | 0 | 3 | 198 | 0 | 0 |
| 20  | GlcNAcβ1-3(GlcNAcβ1-4)(GlcNAcβ1-6)GlcNAc-Sp8                        | 5  | 39   | 0 | 9  | 40   | 0 | 2 | 191 | 0 | 0 |
| 172 | GlcNAcα1-6Galβ1-4GlcNAcβ-Sp8                                        | 9  | 34   | 0 | 13 | 69   | 0 | 1 | 746 | 0 | 0 |
| 423 | GalNAcα1-3(Fuca1-2)Galβ1-3GlcNAcβ1-3GalNAc-Sp14                     | 21 | 50   | 0 | 7  | 49   | 0 | 1 | 500 | 0 | 0 |
| 198 | G-ol-Sp8                                                            | 3  | 162  | 0 | 0  | -528 | 0 | 5 | 100 | 0 | 0 |
| 338 | GlcNAcα1-4Galβ1-3GlcNAcβ-Sp0                                        | 7  | 40   | 0 | 3  | 71   | 0 | 4 | 88  | 0 | 0 |
| 138 | Galβ1-3GalNAcα-Sp14                                                 | 7  | 36   | 0 | 3  | 95   | 0 | 4 | 31  | 0 | 0 |
| 188 | GlcNAcβ1-4GlcNAcβ1-4GlcNAcβ-Sp8                                     | 12 | 31   | 0 | 8  | 70   | 0 | 2 | 414 | 0 | 0 |
| 439 | Galβ1-4Galβ-Sp10                                                    | 7  | 65   | 0 | 6  | 63   | 0 | 3 | 115 | 0 | 0 |
| 14  | Manβ-Sp8                                                            | 5  | 82   | 0 | 4  | 68   | 0 | 4 | 77  | 0 | 0 |
| 5   | GalNAcα-Sp15                                                        | 6  | 25   | 0 | 1  | 58   | 0 | 5 | 125 | 0 | 0 |
| 215 | Manβ1-4GlcNAcβ-Sp0                                                  | 3  | 119  | 0 | 9  | 62   | 0 | 2 | 100 | 0 | 0 |
| 3   | Manα-Sp8                                                            | 7  | 41   | 0 | 3  | 146  | 0 | 4 | 145 | 0 | 0 |
| 245 | Neu5Acα2-3Galβ1-3GlcNAcβ1-3Galβ1-4GlcNAcβ-Sp0                       | 11 | 44   | 0 | 11 | 68   | 0 | 1 | 245 | 0 | 0 |
| 40  | 6-H2PO3Manα-Sp8                                                     | 5  | 91   | 0 | 2  | 211  | 0 | 4 | 102 | 0 | 0 |
| 277 | Neu5Acβ2-6Galβ1-4GlcNAcβ-Sp8                                        | 5  | 87   | 0 | 4  | 72   | 0 | 3 | 125 | 0 | 0 |
| 226 | Neu5Acα2-8Neu5Acα2-3(GalNAcβ1-4)Galβ1-4Glcβ-Sp0                     | 8  | 94   | 0 | 3  | 119  | 0 | 3 | 115 | 0 | 0 |
| 177 | GlcNAcβ1-3GalNAcα-Sp14                                              | 8  | 67   | 0 | 4  | 21   | 0 | 3 | 18  | 0 | 0 |
| 11  | Neu5Acβ-Sp8                                                         | 7  | 41   | 0 | 6  | 75   | 0 | 3 | 154 | 0 | 0 |
| 141 | Galβ1-3GalNAcβ1-3Galα1-4Galβ1-4Glcβ-Sp0                             | 4  | 37   | 0 | 6  | 92   | 0 | 3 | 148 | 0 | 0 |
| 180 | GlcNAcβ1-3Galβ1-4GlcNAcβ-Sp8                                        | 4  | 95   | 0 | 7  | 79   | 0 | 3 | 175 | 0 | 0 |
| 33  | [3OSO3]Galβ1-4[6OSO3]GlcNAcβ-Sp0                                    | 2  | 104  | 0 | 5  | 105  | 0 | 3 | 189 | 0 | 0 |
| 264 | Neu5Acα2-6GalNAcβ1-4GlcNAcβ-Sp0                                     | 5  | 128  | 0 | 7  | 142  | 0 | 2 | 177 | 0 | 0 |
| 140 | Galβ1-3GalNAcβ-Sp8                                                  | 7  | 89   | 0 | 9  | 74   | 0 | 2 | 334 | 0 | 0 |
| 455 | GalNAcβ1-4Galβ1-4Glc-b-sp0                                          | 11 | 57   | 0 | 3  | 17   | 0 | 3 | 168 | 0 | 0 |
| 171 | GlcNAcα1-3Galβ1-4GlcNAcβ-Sp8                                        | 5  | 44   | 0 | 6  | 111  | 0 | 3 | 145 | 0 | 0 |
| 203 | KDNα2-3Galβ1-3GlcNAcβ-Sp0                                           | 8  | 98   | 0 | 6  | 31   | 0 | 2 | 116 | 0 | 0 |
| 9   | Neu5Acα-Sp8                                                         | 13 | 53   | 0 | 4  | 131  | 0 | 2 | 155 | 0 | 0 |
| 405 | Galβ1-3GlcNAcα1-6Galβ1-4GlcNAcβ-Sp0                                 | 3  | 120  | 0 | 0  | 519  | 0 | 4 | 51  | 0 | 0 |
| 270 | Neu5Acα2-6Galβ1-4Glcβ-Sp0                                           | 2  | 203  | 0 | 5  | 30   | 0 | 3 | 93  | 0 | 0 |
| 231 | Neu5Acα2-3(GalNAcβ1-4)Galβ1-4Glcβ-Sp0                               | 8  | 74   | 0 | 9  | 32   | 0 | 1 | 269 | 0 | 0 |
| 130 | Galβ1-4GlcNAcβ1-6GalNAcα-Sp8                                        | 4  | 36   | 0 | 6  | 57   | 0 | 3 | 95  | 0 | 0 |
| 192 | GlcNAcβ1-6Galβ1-4GlcNAcβ-Sp8                                        | -1 | -137 | 0 | 3  | 87   | 0 | 4 | 69  | 0 | 0 |
| 207 | Manα1-2Manα1-3Manα-Sp9                                              | 4  | 118  | 0 | 8  | 64   | 0 | 2 | 102 | 0 | 0 |
| 153 | Galβ1-4[6OSO3]Glcβ-Sp0                                              | 4  | 43   | 0 | 4  | 44   | 0 | 3 | 50  | 0 | 0 |
| 328 | Neu5Acα2-6Galβ1-4GlcNAcβ1-3Galβ1-3GlcNAcβ-Sp0                       | 4  | 16   | 0 | 2  | 135  | 0 | 3 | 106 | 0 | 0 |
| 262 | Neu5Acα2-3Galβ1-4Glcβ-Sp8                                           | 5  | 56   | 0 | 2  | 284  | 0 | 3 | 51  | 0 | 0 |
| 243 | Neu5Acα2-3Galβ-Sp8                                                  | 2  | 76   | 0 | 2  | 224  | 0 | 4 | 24  | 0 | 0 |
| 183 | GlcNAcβ1-4-MDPLys                                                   | 11 | 42   | 0 | 1  | 241  | 0 | 3 | 214 | 0 | 0 |
| 400 | GalNAcα1-3GalNAcβ1-3Galα1-4Galβ1-4GlcNAcβ-Sp0                       | 12 | 74   | 0 | 3  | 79   | 0 | 2 | 94  | 0 | 0 |
| 41  | [6OSO3]Galβ1-4Glcβ-Sp0                                              | 1  | 252  | 0 | 7  | 43   | 0 | 2 | 108 | 0 | 0 |
| 287 | Galβ1-3GlcNAcβ1-3Galβ1-3GlcNAcβ-Sp0                                 | 6  | 15   | 0 | 5  | 65   | 0 | 2 | 189 | 0 | 0 |

|     |                                                                                                                |    |     |   |    |       |   |    |      |   |   |
|-----|----------------------------------------------------------------------------------------------------------------|----|-----|---|----|-------|---|----|------|---|---|
| 182 | GlcNAcβ1-3Galβ1-4Glcβ-Sp0                                                                                      | 9  | 32  | 0 | 3  | 67    | 0 | 3  | 58   | 0 | 0 |
| 169 | Galβ1-4Glcβ-Sp0                                                                                                | 9  | 73  | 0 | 4  | 96    | 0 | 2  | 20   | 0 | 0 |
| 154 | Galβ1-4[6OSO3]Glcβ-Sp8                                                                                         | 4  | 74  | 0 | 4  | 74    | 0 | 3  | 98   | 0 | 0 |
| 266 | Neu5Acα2-6Galβ1-4GlcNAcβ-Sp0                                                                                   | 8  | 49  | 0 | 4  | 118   | 0 | 2  | 134  | 0 | 0 |
| 300 | Galβ1-4GlcNAcβ1-3(Galβ1-4GlcNAcβ1-6)Galβ1-4GlcNAc-Sp0                                                          | 3  | 51  | 0 | 5  | 26    | 0 | 2  | 114  | 0 | 0 |
| 115 | Galα1-3Galβ1-4GlcNAcβ-Sp8                                                                                      | 6  | 81  | 0 | 7  | 42    | 0 | 1  | 156  | 0 | 0 |
| 315 | Neu5Acα2-3Galβ1-3(Neu5Acα2-3Galβ1-4GlcNAcβ1-6)GalNAcα-Sp14                                                     | 7  | 88  | 0 | 2  | 86    | 0 | 3  | 85   | 0 | 0 |
| 157 | Galβ1-4GlcNAcβ1-3GalNAcα-Sp8                                                                                   | 2  | 78  | 0 | 10 | 60    | 0 | 1  | 819  | 0 | 0 |
| 273 | Neu5Acα2-8Neu5Acα-Sp8                                                                                          | 15 | 72  | 0 | 2  | 51    | 0 | 2  | 237  | 0 | 0 |
| 339 | GlcNAcα1-4Galβ1-4GlcNAcβ1-3Galβ1-4Glcβ-Sp0                                                                     | 4  | 114 | 0 | 11 | 38    | 0 | 0  | 1413 | 0 | 0 |
| 225 | Neu5Acα2-8Neu5Acα2-8Neu5Acα2-3Galβ1-4Glcβ-Sp0                                                                  | 4  | 99  | 0 | 8  | 87    | 0 | 1  | 96   | 0 | 0 |
| 109 | Galα1-3(Galα1-4)Galβ1-4GlcNAcβ-Sp8                                                                             | 4  | 90  | 0 | 7  | 94    | 0 | 2  | 283  | 0 | 0 |
| 464 | Glcα1-6Glcα1-6Glcα1-6Glcβ-Sp10                                                                                 | 0  | 583 | 0 | 7  | 44    | 0 | 2  | 119  | 0 | 0 |
| 299 | Galβ1-4GlcNAcβ1-2Manα1-3(Neu5Acα2-6Galβ1-4GlcNAcβ1-2Manα1-6)Manβ1-4GlcNAcβ1-4GlcNAcβ-Sp12                      | 3  | 182 | 0 | 11 | 44    | 0 | 0  | 616  | 0 | 0 |
| 206 | Manα1-2Manα1-3(Manα1-2Manα1-6)Manα-Sp9                                                                         | 5  | 75  | 0 | 4  | 124   | 0 | 2  | 111  | 0 | 0 |
| 310 | HOOC(CH3)CH-3-O-GlcNAcβ1-4GlcNAcβ-Sp10                                                                         | 8  | 38  | 0 | 12 | 68    | 0 | -1 | -406 | 0 | 0 |
| 194 | Glcα1-4Glcα-Sp8                                                                                                | 1  | 128 | 0 | 6  | 75    | 0 | 2  | 147  | 0 | 0 |
| 353 | Galβ1-3(Fuca1-4)GlcNAcβ1-2Manα1-3(Galβ1-3(Fuca1-4)GlcNAcβ1-2Manα1-6)Manβ1-4GlcNAcβ1-4GlcNAcβ-Sp19              | 4  | 72  | 0 | 7  | 92    | 0 | 1  | 215  | 0 | 0 |
| 2   | Glcα-Sp8                                                                                                       | 5  | 43  | 0 | 5  | 68    | 0 | 2  | 107  | 0 | 0 |
| 48  | [9NAc]Neu5Acα2-6Galβ1-4GlcNAcβ-Sp8                                                                             | 8  | 66  | 0 | 1  | 297   | 0 | 3  | 72   | 0 | 0 |
| 121 | Galα1-4Galβ1-4Glcβ-Sp0                                                                                         | 13 | 50  | 0 | 1  | 532   | 0 | 2  | 95   | 0 | 0 |
| 241 | Neu5Acα2-3Galβ1-3(Neu5Acα2-6)GalNAcα-Sp8                                                                       | 6  | 62  | 0 | 4  | 32    | 0 | 2  | 85   | 0 | 0 |
| 12  | Galβ-Sp8                                                                                                       | 15 | 47  | 0 | 9  | 65    | 0 | -1 | -585 | 0 | 0 |
| 26  | [3OSO3]Galβ1-4[6OSO3]Glcβ-Sp8                                                                                  | 4  | 77  | 0 | 0  | 518   | 0 | 3  | 98   | 0 | 0 |
| 91  | GalNAcα1-3GalNAcβ-Sp8                                                                                          | 7  | 75  | 0 | 6  | 42    | 0 | 1  | 372  | 0 | 0 |
| 25  | [3OSO3]Galβ1-4[6OSO3]Glcβ-Sp0                                                                                  | 7  | 48  | 0 | 2  | 76    | 0 | 2  | 223  | 0 | 0 |
| 363 | Manα1-3(Galβ1-4GlcNAcβ1-2Manα1-6)Manβ1-4GlcNAcβ1-4GlcNAcβ-Sp12                                                 | 4  | 71  | 0 | 2  | 229   | 0 | 3  | 202  | 0 | 0 |
| 337 | GlcNAcα1-4Galβ1-4GlcNAcβ-Sp0                                                                                   | 4  | 81  | 0 | 6  | 67    | 0 | 1  | 174  | 0 | 0 |
| 117 | Galα1-3Galβ-Sp8                                                                                                | 6  | 81  | 0 | 1  | 94    | 0 | 2  | 113  | 0 | 0 |
| 317 | Neu5Acα2-6Galβ1-4GlcNAcβ1-2Manα1-3(Galβ1-4GlcNAcβ1-2Manα1-6)Manβ1-4GlcNAcβ1-4GlcNAcβ-Sp12                      | 5  | 21  | 0 | -1 | -1011 | 0 | 3  | 112  | 0 | 0 |
| 345 | Neu5Acα2-6Galβ1-4GlcNAcβ1-2Manα1-6Manβ1-4GlcNAcβ1-4GlcNAcβ-Sp12                                                | 12 | 51  | 0 | 7  | 65    | 0 | 0  | 3257 | 0 | 0 |
| 167 | Galβ1-4GlcNAcβ-Sp0                                                                                             | 4  | 120 | 0 | 5  | 53    | 0 | 1  | 119  | 0 | 0 |
| 35  | [3OSO3]Galβ1-4GlcNAcβ-Sp0                                                                                      | 3  | 309 | 0 | 6  | 62    | 0 | 1  | 507  | 0 | 0 |
| 164 | Galβ1-4GlcNAcβ1-6(Galβ1-3)GalNAcα-Sp8                                                                          | 3  | 123 | 0 | 3  | 87    | 0 | 2  | 278  | 0 | 0 |
| 435 | Galβ1-4GlcNAcβ1-4(Galβ1-4GlcNAcβ1-2)Manα1-3(GlcNAcβ1-4)(Galβ1-4GlcNAcβ1-2Manα1-6)Manβ1-4GlcNAcβ1-4GlcNAcβ-Sp21 | 9  | 142 | 0 | 1  | 584   | 0 | 2  | 313  | 0 | 0 |
| 186 | GlcNAcβ1-4GlcNAcβ1-4GlcNAcβ1-4GlcNAcβ1-4GlcNAcβ1-4β-Sp8                                                        | 5  | 68  | 0 | 4  | 124   | 0 | 2  | 415  | 0 | 0 |
| 306 | GlcNAcβ1-2Manα1-3(Neu5Acα2-6Galβ1-4GlcNAcβ1-2Manα1-6)Manβ1-4GlcNAcβ1-4GlcNAcβ-Sp12                             | 15 | 67  | 0 | 9  | 110   | 0 | -1 | -166 | 0 | 0 |
| 390 | Galβ1-3GlcNAcβ1-3GalNAcα-Sp14                                                                                  | 7  | 72  | 0 | 2  | 259   | 0 | 2  | 103  | 0 | 0 |
| 201 | GlcAβ1-3Galβ-Sp8                                                                                               | 3  | 54  | 0 | 4  | 76    | 0 | 2  | 84   | 0 | 0 |
| 450 | Galβ1-4GlcNAcβ1-2Manα-Sp0                                                                                      | 9  | 30  | 0 | 1  | 217   | 0 | 2  | 311  | 0 | 0 |
| 309 | GlcNAcβ1-4GlcNAcβ-Sp12                                                                                         | 6  | 68  | 0 | 1  | 555   | 0 | 2  | 253  | 0 | 0 |
| 178 | GlcNAcβ1-3Galβ-Sp8                                                                                             | 6  | 26  | 0 | 1  | 816   | 0 | 2  | 138  | 0 | 0 |
| 356 | KDNa2-6Galβ1-4GlcNAcβ-Sp0                                                                                      | 6  | 57  | 0 | -1 | -442  | 0 | 3  | 140  | 0 | 0 |
| 205 | Manα1-2Manα1-2Manα1-3Manα-Sp9                                                                                  | 7  | 114 | 0 | 1  | 289   | 0 | 2  | 186  | 0 | 0 |

|     |                                                                                                      |    |      |   |    |       |   |    |       |   |   |
|-----|------------------------------------------------------------------------------------------------------|----|------|---|----|-------|---|----|-------|---|---|
| 323 | Neu5Acα2-3Galβ1-4GlcNAcβ1-2Manα1-3(Neu5Acα2-3Galβ1-4GlcNAcβ1-2Manα1-6)Manβ1-4GlcNAcβ1-4GlcNAcβ-Sp12  | 10 | 46   | 0 | 8  | 63    | 0 | -1 | -1372 | 0 | 0 |
| 331 | Galα1-4Galβ1-4GlcNAcβ1-3Galβ1-4Glcβ-Sp0                                                              | 12 | 75   | 0 | 4  | 43    | 0 | 0  | 1757  | 0 | 0 |
| 179 | GlcNAcβ1-3Galβ1-4GlcNAcβ-Sp0                                                                         | 5  | 91   | 0 | -2 | -98   | 0 | 3  | 291   | 0 | 0 |
| 232 | Neu5Acα2-3(Neu5Acα2-3Galβ1-3GalNAcβ1-4)Galβ1-4Glcβ-Sp0                                               | 2  | 407  | 0 | -1 | -279  | 0 | 3  | 134   | 0 | 0 |
| 44  | [6OSO3]Galβ1-4[6OSO3]Glcβ-Sp8                                                                        | 7  | 35   | 0 | 4  | 113   | 0 | 1  | 403   | 0 | 0 |
| 46  | [6OSO3]GlcNAcβ-Sp8                                                                                   | 9  | 59   | 0 | 3  | 41    | 0 | 1  | 751   | 0 | 0 |
| 16  | GlcNAcβ-Sp0                                                                                          | 3  | 128  | 0 | 2  | 74    | 0 | 2  | 97    | 0 | 0 |
| 236 | Neu5Acα2-3Galβ1-3[6OSO3]GlcNAc-Sp8                                                                   | 3  | 35   | 0 | 0  | 764   | 0 | 2  | 212   | 0 | 0 |
| 191 | GlcNAcβ1-6GalNAcα-Sp14                                                                               | 2  | 124  | 0 | 4  | 70    | 0 | 1  | 201   | 0 | 0 |
| 28  | [3OSO3]Galβ1-3GalNAcα-Sp8                                                                            | 6  | 127  | 0 | 5  | 102   | 0 | 0  | 684   | 0 | 0 |
| 133 | Galβ1-3(Neu5Acα2-6)GalNAcα-Sp8                                                                       | 5  | 40   | 0 | 8  | 41    | 0 | -1 | -523  | 0 | 0 |
| 404 | Galβ1-3GlcNAcβ1-6Galβ1-4GlcNAcβ-Sp0                                                                  | 7  | 68   | 0 | 3  | 251   | 0 | 1  | 561   | 0 | 0 |
| 15  | GalNAcβ-Sp8                                                                                          | 6  | 70   | 0 | 1  | 65    | 0 | 1  | 177   | 0 | 0 |
| 42  | [6OSO3]Galβ1-4Glcβ-Sp8                                                                               | 2  | 156  | 0 | -2 | -140  | 0 | 3  | 126   | 0 | 0 |
| 49  | Manα1-3(Manα1-6)Manβ1-4GlcNAcβ1-4GlcNAcβ-Sp12                                                        | 8  | 79   | 0 | 5  | 89    | 0 | 0  | 7044  | 0 | 0 |
| 447 | Galβ1-4GlcNAcβ1-3(Galβ1-4GlcNAcβ1-6)GalNAc-Sp14                                                      | 4  | 126  | 0 | 2  | 250   | 0 | 1  | 236   | 0 | 0 |
| 230 | Neu5Acα2-3(GalNAcβ1-4)Galβ1-4GlcNAcβ-Sp8                                                             | 2  | 67   | 0 | 5  | 66    | 0 | 1  | 389   | 0 | 0 |
| 112 | Galα1-3GalNAcβ-Sp8                                                                                   | 10 | 42   | 0 | 5  | 78    | 0 | 0  | -1366 | 0 | 0 |
| 410 | Galβ1-3GalNAcβ1-4(Neu5Acα2-8Neu5Acα2-3)Galβ1-4Glcβ-Sp0                                               | 6  | 89   | 0 | 4  | 96    | 0 | 0  | 1853  | 0 | 0 |
| 162 | Galβ1-4GlcNAcβ1-3Galβ1-4Glcβ-Sp0                                                                     | 5  | 75   | 0 | 0  | 5338  | 0 | 2  | 262   | 0 | 0 |
| 318 | Neu5Acα2-6Galβ1-4GlcNAcβ1-2Manα1-3(GlcNAcβ1-2Manα1-6)Manβ1-4GlcNAcβ1-4GlcNAcβ-Sp12                   | 8  | 41   | 0 | -2 | -135  | 0 | 2  | 261   | 0 | 0 |
| 279 | Neu5Gcα2-3Galβ1-3GlcNAcβ-Sp0                                                                         | 7  | 137  | 0 | 6  | 103   | 0 | -1 | -731  | 0 | 0 |
| 308 | GlcNAcβ1-4GlcNAcβ-Sp10                                                                               | 4  | 113  | 0 | 3  | 175   | 0 | 1  | 853   | 0 | 0 |
| 422 | Galα1-3(Fucα1-2)Galβ1-3GlcNAcβ1-3GalNAc-Sp14                                                         | 6  | 55   | 0 | 7  | 13    | 0 | -1 | -580  | 0 | 0 |
| 272 | Neu5Acα2-6Galβ-Sp8                                                                                   | 3  | 45   | 0 | 5  | 93    | 0 | 0  | 18608 | 0 | 0 |
| 427 | Galβ1-3GlcNAcβ1-2Manα1-3(Galβ1-3GlcNAcβ1-2(Galβ1-3GlcNAcβ1-6)Manα1-6)Manβ1-4GlcNAcβ1-4GlcNAcβ-Sp19   | 3  | 193  | 0 | 3  | 85    | 0 | 1  | 741   | 0 | 0 |
| 440 | Galβ1-6Galβ-Sp10                                                                                     | 2  | 99   | 0 | -1 | -136  | 0 | 2  | 204   | 0 | 0 |
| 209 | Manα1-2Manα1-6(Manα1-3)Manα1-6(Manα1-2Manα1-2Manα1-3)Manβ1-4GlcNAcβ1-4GlcNAcβ-Sp12                   | 9  | 69   | 0 | 2  | 179   | 0 | 0  | 2044  | 0 | 0 |
| 168 | Galβ1-4GlcNAcβ-Sp8                                                                                   | 11 | 54   | 0 | -1 | -543  | 0 | 1  | 185   | 0 | 0 |
| 136 | Galβ1-3(Neu5Acα2-6)GlcNAcβ1-4Galβ1-4Glcβ-Sp10                                                        | 3  | 117  | 0 | -2 | -236  | 0 | 2  | 255   | 0 | 0 |
| 276 | Neu5Acβ2-6GalNAcα-Sp8                                                                                | 2  | 131  | 0 | 1  | 168   | 0 | 1  | 630   | 0 | 0 |
| 433 | GlcNAcβ1-4(GlcNAcβ1-2)Manα1-3(GlcNAcβ1-4)(GlcNAcβ1-6(GlcNAcβ1-2)Manα1-6)Manβ1-4GlcNAcβ1-4GlcNAc-Sp21 | 0  | 5598 | 0 | 2  | 163   | 0 | 1  | 380   | 0 | 0 |
| 460 | Galβ1-4GlcNAcβ1-6(Galβ1-4GlcNAcβ1-2)Manα1-6(Galβ1-4GlcNAcβ1-2Manα1-3)Manβ1-4GlcNAcβ1-4GlcNAcβ-Sp19   | 15 | 18   | 0 | 11 | 168   | 0 | -4 | -69   | 0 | 0 |
| 24  | [3OSO3]Galβ1-4Glcβ-Sp8                                                                               | 13 | 119  | 0 | 3  | 164   | 0 | -1 | -97   | 0 | 0 |
| 17  | GlcNAcβ-Sp8                                                                                          | 19 | 27   | 0 | 0  | 358   | 0 | -2 | -47   | 0 | 0 |
| 199 | GlcAα-Sp8                                                                                            | 16 | 97   | 0 | 0  | 746   | 0 | -1 | -221  | 0 | 0 |
| 176 | GlcNAcβ1-3GalNAcα-Sp8                                                                                | 5  | 33   | 0 | 0  | 17711 | 0 | 0  | -3486 | 0 | 0 |
| 134 | Galβ1-3(Neu5Acα2-6)GalNAcα-Sp14                                                                      | 2  | 127  | 0 | 3  | 80    | 0 | -1 | -240  | 0 | 0 |
| 313 | Manα1-2Manα1-2Manα1-3(Manα1-2Manα1-6(Manα1-3)Manα1-6)Manα-Sp9                                        | 2  | 262  | 0 | 2  | 173   | 0 | 0  | -1514 | 0 | 0 |
| 170 | Galβ1-4Glcβ-Sp8                                                                                      | 14 | 67   | 0 | -1 | -155  | 0 | -1 | -216  | 0 | 0 |
| 465 | Glcα1-4Glcα1-4Glcα1-4Glcβ-Sp10                                                                       | 1  | 131  | 0 | 6  | 158   | 0 | -2 | -39   | 0 | 0 |
| 285 | Neu5Gcα-Sp8                                                                                          | 4  | 121  | 0 | 2  | 117   | 0 | -1 | -61   | 0 | 0 |
| 420 | GlcNAcβ1-2Manα1-3(GlcNAcβ1-2(GlcNAcβ1-6)Manα1-6)Manβ1-4GlcNAcβ1-4GlcNAcβ-Sp19                        | 5  | 67   | 0 | 1  | 149   | 0 | -2 | -157  | 0 | 0 |



|     |                                                                                       |   |     |   |   |     |   |    |      |   |   |
|-----|---------------------------------------------------------------------------------------|---|-----|---|---|-----|---|----|------|---|---|
| 122 | Gal $\alpha$ 1-4GlcNAc $\beta$ -Sp8                                                   | 7 | 135 | 0 | 1 | 506 | 0 | -2 | -309 | 0 | 0 |
| 181 | GlcNAc $\beta$ 1-3Gal $\beta$ 1-4GlcNAc $\beta$ 1-3Gal $\beta$ 1-4GlcNAc $\beta$ -Sp0 | 1 | 533 | 0 | 8 | 49  | 0 | -4 | -45  | 0 | 0 |
| 326 | Neu5Ac(9Ac)a2-3Gal $\beta$ 1-4GlcNAc $\beta$ -Sp0                                     | 4 | 140 | 0 | 2 | 116 | 0 | -3 | -110 | 0 | 0 |

|        |                                                                                                 |
|--------|-------------------------------------------------------------------------------------------------|
| Sp0    | CH <sub>2</sub> CH <sub>2</sub> NH <sub>2</sub>                                                 |
| Sp8    | CH <sub>2</sub> CH <sub>2</sub> CH <sub>2</sub> NH <sub>2</sub>                                 |
| Sp9    | CH <sub>2</sub> CH <sub>2</sub> CH <sub>2</sub> CH <sub>2</sub> CH <sub>2</sub> NH <sub>2</sub> |
| Sp10   | NHCOCH <sub>2</sub> NH                                                                          |
| Sp11   | OCH <sub>2</sub> C <sub>6</sub> H <sub>4</sub> -p-NHCOCH <sub>2</sub> NH                        |
| Sp12   | Asparagine                                                                                      |
| Sp13   | Glycine                                                                                         |
| Sp14   | Threonine                                                                                       |
| Sp15   | Serine                                                                                          |
| Sp16   | PNP (OC <sub>6</sub> H <sub>4</sub> NH <sub>2</sub> )                                           |
| Sp17   | OCH <sub>2</sub> C <sub>6</sub> H <sub>4</sub> NH <sub>2</sub>                                  |
| Sp18   | O(CH <sub>2</sub> ) <sub>3</sub> NHCO(CH <sub>2</sub> ) <sub>5</sub> NH <sub>2</sub>            |
| Sp19   | EN or NK                                                                                        |
| Sp20   | GENR                                                                                            |
| Sp21   | N(CH <sub>3</sub> )-O-(CH <sub>2</sub> ) <sub>2</sub> -NH <sub>2</sub>                          |
| Sp22   | NST                                                                                             |
| MDPLys | Mur-L-Ala-D-iGln $\beta$ -(CH <sub>2</sub> ) <sub>4</sub> NH <sub>2</sub>                       |

Table S2. Glycan array (v4.1) data for all fucosylated glycans bound by BambL at 0.2  $\mu\text{g ml}^{-1}$ 

| Chart No | CFG no | Glycan Structure                                                                                                                                                                                                  | Average | StDEV |
|----------|--------|-------------------------------------------------------------------------------------------------------------------------------------------------------------------------------------------------------------------|---------|-------|
| 1        | 6      | Fuca $\alpha$ -Sp8                                                                                                                                                                                                | 11778   | 255   |
| 2        | 78     | Fuca1-2Gal $\beta$ -Sp8                                                                                                                                                                                           | 7796    | 252   |
| 3        | 61     | Fuca1-2Gal $\beta$ 1-3GalNAc $\alpha$ -Sp8                                                                                                                                                                        | 1054    | 19    |
| 4        | 367    | Fuca1-2Gal $\beta$ 1-3GlcNAc $\beta$ 1-3(Gal $\beta$ 1-4(Fuca1-3)GlcNAc $\beta$ 1-6)Gal $\beta$ 1-4Glc-Sp21                                                                                                       | 992     | 25    |
| 5        | 65     | Fuca1-2Gal $\beta$ 1-3GlcNAc $\beta$ 1-3Gal $\beta$ 1-4Glc $\beta$ -Sp8                                                                                                                                           | 780     | 62    |
| 6        | 68     | Fuca1-2Gal $\beta$ 1-3GlcNAc $\beta$ -Sp8                                                                                                                                                                         | 749     | 120   |
| 7        | 428    | Fuca1-2Gal $\beta$ 1-3GlcNAc $\beta$ 1-3(Gal $\beta$ 1-4GlcNAc $\beta$ 1-6)Gal $\beta$ 1-4Glc-Sp21                                                                                                                | 638     | 274   |
| 8        | 388    | Fuca1-2Gal $\beta$ 1-3GalNAc $\alpha$ 1-3(Fuca1-2)Gal $\beta$ 1-4Glc $\beta$ -Sp0                                                                                                                                 | 567     | 155   |
| 9        | 59     | Fuca1-2Gal $\beta$ 1-3GalNAc $\beta$ 1-3Gal $\alpha$ 1-4Gal $\beta$ 1-4Glc $\beta$ -Sp9                                                                                                                           | 527     | 48    |
| 10       | 389    | Fuca1-2Gal $\beta$ 1-3GalNAc $\alpha$ 1-3(Fuca1-2)Gal $\beta$ 1-4GlcNAc $\beta$ -Sp0                                                                                                                              | 434     | 50    |
| 11       | 359    | Fuca1-2Gal $\beta$ 1-3GlcNAc $\beta$ 1-2Man $\alpha$ 1-3(Fuca1-2Gal $\beta$ 1-3GlcNAc $\beta$ 1-2Man $\alpha$ 1-6)Man $\beta$ 1-4GlcNAc $\beta$ 1-4GlcNAc $\beta$ -Sp20                                           | 380     | 55    |
| 12       | 425    | Fuca1-2Gal $\beta$ 1-3GlcNAc $\beta$ 1-2Man $\alpha$ 1-3(Fuca1-2Gal $\beta$ 1-3GlcNAc $\beta$ 1-2Man $\alpha$ 1-6)Man $\beta$ 1-4GlcNAc $\beta$ 1-4(Fuca1-6)GlcNAc $\beta$ -Sp22                                  | 199     | 19    |
| 13       | 458    | Neu5Ac $\alpha$ 2-6Gal $\beta$ 1-4GlcNAc $\beta$ 1-6(Fuca1-2Gal $\beta$ 1-3GlcNAc $\beta$ 1-3)Gal $\beta$ -4Glc-Sp21                                                                                              | 168     | 106   |
| 14       | 58     | Fuca1-2Gal $\beta$ 1-3GalNAc $\beta$ 1-3Gal $\alpha$ -Sp9                                                                                                                                                         | 58      | 16    |
| 15       | 421    | Fuca1-2Gal $\beta$ 1-3GlcNAc $\beta$ 1-3GalNAc-Sp14                                                                                                                                                               | 52      | 21    |
| 16       | 64     | Fuca1-2Gal $\beta$ 1-3GalNAc $\beta$ 1-4(Neu5Ac $\alpha$ 2-3)Gal $\beta$ 1-4Glc $\beta$ -Sp9                                                                                                                      | 21      | 24    |
| 17       | 76     | Fuca1-2Gal $\beta$ 1-4GlcNAc $\beta$ -Sp8                                                                                                                                                                         | 5809    | 384   |
| 18       | 74     | Fuca1-2Gal $\beta$ 1-4GlcNAc $\beta$ 1-3Gal $\beta$ 1-4GlcNAc $\beta$ 1-3Gal $\beta$ 1-4GlcNAc $\beta$ -Sp0                                                                                                       | 5653    | 94    |
| 19       | 73     | Fuca1-2Gal $\beta$ 1-4GlcNAc $\beta$ 1-3Gal $\beta$ 1-4GlcNAc $\beta$ -Sp0                                                                                                                                        | 4190    | 559   |
| 20       | 218    | Fuca1-2[6OSO3]Gal $\beta$ 1-4GlcNAc-Sp0                                                                                                                                                                           | 3944    | 265   |
| 21       | 451    | Fuca1-2Gal $\beta$ 1-4GlcNAc $\beta$ 1-3(Fuca1-2Gal $\beta$ 1-4GlcNAc $\beta$ 1-6)GalNAc-Sp14                                                                                                                     | 3671    | 1276  |
| 22       | 77     | Fuca1-2Gal $\beta$ 1-4Glc $\beta$ -Sp0                                                                                                                                                                            | 3390    | 157   |
| 23       | 219    | Fuca1-2Gal $\beta$ 1-4[6OSO3]GlcNAc-Sp8                                                                                                                                                                           | 2765    | 215   |
| 24       | 260    | Fuca1-2Gal $\beta$ 1-4[6OSO3]Glc-Sp0                                                                                                                                                                              | 2659    | 1140  |
| 25       | 246    | Fuca1-2[6OSO3]Gal $\beta$ 1-4Glc-Sp0                                                                                                                                                                              | 2124    | 132   |
| 26       | 220    | Fuca1-2[6OSO3]Gal $\beta$ 1-4[6OSO3]Glc-Sp0                                                                                                                                                                       | 2036    | 90    |
| 27       | 360    | Fuca1-2Gal $\beta$ 1-4GlcNAc $\beta$ 1-2Man $\alpha$ 1-3(Fuca1-2Gal $\beta$ 1-4GlcNAc $\beta$ 1-2Man $\alpha$ 1-6)Man $\beta$ 1-4GlcNAc $\beta$ 1-4GlcNAc $\beta$ -Sp20                                           | 2027    | 245   |
| 28       | 419    | Fuca1-2Gal $\beta$ 1-4GlcNAc $\beta$ 1-2Man $\alpha$ 1-3(Fuca1-2Gal $\beta$ 1-4GlcNAc $\beta$ 1-2Man $\alpha$ 1-6)Man $\beta$ 1-4GlcNAc $\beta$ 1-4(Fuca1-6)GlcNAc $\beta$ -Sp22                                  | 833     | 92    |
| 29       | 445    | Fuca1-2Gal $\beta$ 1-4GlcNAc $\beta$ 1-2(Fuca1-2Gal $\beta$ 1-4GlcNAc $\beta$ 1-4)Man $\alpha$ 1-3(Fuca1-2Gal $\beta$ 1-4GlcNAc $\beta$ 1-2Man $\alpha$ 1-6)Man $\beta$ 1-4GlcNAc $\beta$ 1-4GlcNAc $\beta$ -Sp12 | 511     | 45    |
| 30       | 398    | Fuca1-2Gal $\beta$ 1-4GlcNAc $\beta$ 1-3GalNAc $\alpha$ -Sp14                                                                                                                                                     | 326     | 144   |
| 31       | 89     | GalNAc $\alpha$ 1-3(Fuca1-2)Gal $\beta$ -Sp8                                                                                                                                                                      | 2348    | 133   |
| 32       | 333    | GalNAc $\alpha$ 1-3(Fuca1-2)Gal $\beta$ 1-4GlcNAc $\beta$ 1-3Gal $\beta$ 1-4GlcNAc $\beta$ -Sp0                                                                                                                   | 335     | 16    |

|    |     |                                                                                                                                                                                                                            |      |     |
|----|-----|----------------------------------------------------------------------------------------------------------------------------------------------------------------------------------------------------------------------------|------|-----|
| 33 | 459 | GalNAc $\alpha$ 1-3(Fuca1-2)Gal $\beta$ 1-3GlcNAc $\beta$ 1-2Man $\alpha$ 1-6(GalNAc $\alpha$ 1-3(Fuca1-2)Gal $\beta$ 1-3GlcNAc $\beta$ 1-2Man $\alpha$ 1-3)Man $\beta$ 1-4GlcNAc $\beta$ 1-4(Fuca1-6)GlcNAc $\beta$ -Sp22 | 324  | 77  |
| 34 | 456 | GalNAc $\alpha$ 1-3(Fuca1-2)Gal $\beta$ 1-4GlcNAc $\beta$ 1-2Man $\alpha$ 1-6(GalNAc $\alpha$ 1-3(Fuca1-2)Gal $\beta$ 1-4GlcNAc $\beta$ 1-2Man $\alpha$ 1-3)Man $\beta$ 1-4GlcNAc $\beta$ 1-4(Fuca1-6)GlcNAc $\beta$ -Sp22 | 320  | 167 |
| 35 | 155 | Gal $\beta$ 1-4GalNAc $\alpha$ 1-3(Fuca1-2)Gal $\beta$ 1-4GlcNAc $\beta$ -Sp8                                                                                                                                              | 315  | 110 |
| 36 | 453 | GalNAc $\alpha$ 1-3Fuca1-2Gal $\beta$ 1-4GlcNAc $\beta$ 1-3(GalNAc $\alpha$ 1-3Fuca1-2Gal $\beta$ 1-4GlcNAc $\beta$ 1-6)GalNAc-Sp14                                                                                        | 168  | 6   |
| 37 | 83  | GalNAc $\alpha$ 1-3(Fuca1-2)Gal $\beta$ 1-4(Fuca1-3)GlcNAc $\beta$ -Sp0                                                                                                                                                    | 139  | 21  |
| 38 | 334 | GalNAc $\alpha$ 1-3(Fuca1-2)Gal $\beta$ 1-4GlcNAc $\beta$ 1-3Gal $\beta$ 1-4GlcNAc $\beta$ 1-3Gal $\beta$ 1-4GlcNAc $\beta$ -Sp0                                                                                           | 88   | 21  |
| 39 | 87  | GalNAc $\alpha$ 1-3(Fuca1-2)Gal $\beta$ 1-4Glc $\beta$ -Sp0                                                                                                                                                                | 60   | 18  |
| 40 | 86  | GalNAc $\alpha$ 1-3(Fuca1-2)Gal $\beta$ 1-4GlcNAc $\beta$ -Sp8                                                                                                                                                             | 58   | 23  |
| 41 |     |                                                                                                                                                                                                                            |      |     |
| 42 | 369 | GalNAc $\alpha$ 1-3(Fuca1-2)Gal $\beta$ 1-4GlcNAc $\beta$ 1-2Man $\alpha$ 1-3(GalNAc $\alpha$ 1-3(Fuca1-2)Gal $\beta$ 1-4GlcNAc $\beta$ 1-2Man $\alpha$ 1-6)Man $\beta$ 1-4GlcNAc $\beta$ 1-4GlcNAc $\beta$ -Sp20          | 26   | 11  |
| 43 | 417 | GalNAc $\alpha$ 1-3(Fuca1-2)Gal $\beta$ 1-4(Fuca1-3)GlcNAc $\beta$ 1-3GalNAc-Sp14                                                                                                                                          | 16   | 7   |
| 44 | 392 | GalNAc $\alpha$ 1-3(Fuca1-2)Gal $\beta$ 1-3GalNAc $\alpha$ 1-3(Fuca1-2)Gal $\beta$ 1-4GlcNAc $\beta$ -Sp0                                                                                                                  | 7    | 2   |
| 45 | 423 | GalNAc $\alpha$ 1-3(Fuca1-2)Gal $\beta$ 1-3GlcNAc $\beta$ 1-3GalNAc-Sp14                                                                                                                                                   | 7    | 3   |
| 46 | 372 | GalNAc $\alpha$ 1-3(Fuca1-2)Gal $\beta$ 1-3GlcNAc $\beta$ 1-2Man $\alpha$ 1-3(GalNAc $\alpha$ 1-3(Fuca1-2)Gal $\beta$ 1-3GlcNAc $\beta$ 1-2Man $\alpha$ 1-6)Man $\beta$ 1-4GlcNAc $\beta$ 1-4GlcNAc $\beta$ -Sp20          | 6    | 3   |
| 47 | 413 | GalNAc $\alpha$ 1-3(Fuca1-2)Gal $\beta$ 1-4GlcNAc $\beta$ 1-3GalNAc-Sp14                                                                                                                                                   | 5    | 3   |
| 48 | 379 | Gal $\beta$ 1-3GalNAc $\alpha$ 1-3(Fuca1-2)Gal $\beta$ 1-4Glc-Sp0                                                                                                                                                          | 5    | 7   |
| 49 | 82  | GalNAc $\alpha$ 1-3(Fuca1-2)Gal $\beta$ 1-3GlcNAc $\beta$ -Sp0                                                                                                                                                             | 5    | 1   |
| 50 |     |                                                                                                                                                                                                                            |      |     |
| 51 |     |                                                                                                                                                                                                                            |      |     |
| 52 | 107 | Gal $\alpha$ 1-3(Fuca1-2)Gal $\beta$ -Sp8                                                                                                                                                                                  | 2914 | 220 |
| 53 | 426 | Gal $\alpha$ 1-3(Fuca1-2)Gal $\beta$ 1-4GlcNAc $\beta$ 1-2Man $\alpha$ 1-3(Gal $\alpha$ 1-3(Fuca1-2)Gal $\beta$ 1-4GlcNAc $\beta$ 1-2Man $\alpha$ 1-6)Man $\beta$ 1-4GlcNAc $\beta$ 1-4(Fuca1-6)GlcNAc $\beta$ -Sp22       | 401  | 32  |
| 54 | 457 | Gal $\alpha$ 1-3(Fuca1-2)Gal $\beta$ 1-3GlcNAc $\beta$ 1-2Man $\alpha$ 1-6(Gal $\alpha$ 1-3(Fuca1-2)Gal $\beta$ 1-3GlcNAc $\beta$ 1-2Man $\alpha$ 1-3)Man $\beta$ 1-4GlcNAc $\beta$ 1-4(Fuca1-6)GlcNAc $\beta$ -Sp22       | 246  | 74  |
| 55 | 104 | Gal $\alpha$ 1-3(Fuca1-2)Gal $\beta$ 1-4(Fuca1-3)GlcNAc $\beta$ -Sp8                                                                                                                                                       | 241  | 53  |
| 56 | 105 | Gal $\alpha$ 1-3(Fuca1-2)Gal $\beta$ 1-4GlcNAc-Sp0                                                                                                                                                                         | 119  | 39  |
| 57 | 106 | Gal $\alpha$ 1-3(Fuca1-2)Gal $\beta$ 1-4Glc $\beta$ -Sp0                                                                                                                                                                   | 29   | 16  |
| 58 | 370 | Gal $\alpha$ 1-3(Fuca1-2)Gal $\beta$ 1-4GlcNAc $\beta$ 1-2Man $\alpha$ 1-3(Gal $\alpha$ 1-3(Fuca1-2)Gal $\beta$ 1-4GlcNAc $\beta$ 1-2Man $\alpha$ 1-6)Man $\beta$ 1-4GlcNAc $\beta$ 1-4GlcNAc $\beta$ -Sp20                | 23   | 10  |
| 59 | 412 | Gal $\alpha$ 1-3(Fuca1-2)Gal $\beta$ 1-4GlcNAc $\beta$ 1-3GalNAc-Sp14                                                                                                                                                      | 22   | 21  |
| 60 | 373 | Gal $\alpha$ 1-3(Fuca1-2)Gal $\beta$ 1-3GlcNAc $\beta$ 1-2Man $\alpha$ 1-3(Gal $\alpha$ 1-3(Fuca1-2)Gal $\beta$ 1-3GlcNAc $\beta$ 1-2Man $\alpha$ 1-6)Man $\beta$ 1-4GlcNAc $\beta$ 1-4GlcNAc $\beta$ -Sp20                | 17   | 5   |
| 61 | 463 | Gal $\alpha$ 1-3(Fuca1-2)Gal $\beta$ 1-3GalNAc-Sp8                                                                                                                                                                         | 14   | 14  |
| 62 | 422 | Gal $\alpha$ 1-3(Fuca1-2)Gal $\beta$ 1-3GlcNAc $\beta$ 1-3GalNAc-Sp14                                                                                                                                                      | 7    | 1   |
| 63 | 102 | Gal $\alpha$ 1-3(Fuca1-2)Gal $\beta$ 1-3GlcNAc $\beta$ -Sp8                                                                                                                                                                | 6    | 2   |
| 64 | 462 | Gal $\alpha$ 1-3(Fuca1-2)Gal $\beta$ 1-3GalNAc-Sp8                                                                                                                                                                         | 1    | 2   |

|    |     |                                                                                                                                                                                                             |       |     |
|----|-----|-------------------------------------------------------------------------------------------------------------------------------------------------------------------------------------------------------------|-------|-----|
| 65 |     |                                                                                                                                                                                                             |       |     |
| 66 | 80  | Fuca1-4GlcNAc $\beta$ -Sp8                                                                                                                                                                                  | 12754 | 745 |
| 67 | 125 | Gal $\beta$ 1-3(Fuca1-4)GlcNAc $\beta$ 1-3Gal $\beta$ 1-4(Fuca1-3)GlcNAc $\beta$ -Sp0                                                                                                                       | 2639  | 172 |
| 68 | 128 | Gal $\beta$ 1-3(Fuca1-4)GlcNAc $\beta$ -Sp8                                                                                                                                                                 | 1975  | 213 |
| 69 | 275 | Gal $\beta$ 1-3(Fuca1-4)GlcNAc $\beta$ 1-3Gal $\beta$ 1-3(Fuca1-4)GlcNAc $\beta$ -Sp0                                                                                                                       | 1757  | 126 |
| 70 | 27  | [3OSO3]Gal $\beta$ 1-3(Fuca1-4)GlcNAc $\beta$ -Sp8                                                                                                                                                          | 1064  | 31  |
| 71 | 237 | Neu5Ac $\alpha$ 2-3Gal $\beta$ 1-3(Fuca1-4)GlcNAc $\beta$ -Sp8                                                                                                                                              | 568   | 210 |
| 72 | 238 | Neu5Ac $\alpha$ 2-3Gal $\beta$ 1-3(Fuca1-4)GlcNAc $\beta$ 1-3Gal $\beta$ 1-4(Fuca1-3)GlcNAc $\beta$ -Sp0                                                                                                    | 537   | 83  |
| 73 | 126 | Gal $\beta$ 1-3(Fuca1-4)GlcNAc $\beta$ 1-3Gal $\beta$ 1-4GlcNAc $\beta$ -Sp0                                                                                                                                | 503   | 47  |
| 74 | 329 | Neu5Ac $\alpha$ 2-3Gal $\beta$ 1-3(Fuca1-4)GlcNAc $\beta$ 1-3Gal $\beta$ 1-3(Fuca1-4)GlcNAc $\beta$ -Sp0                                                                                                    | 414   | 37  |
| 75 | 364 | Gal $\beta$ 1-3(Fuca1-4)GlcNAc $\beta$ 1-2Man $\alpha$ 1-3(Gal $\beta$ 1-3(Fuca1-4)GlcNAc $\beta$ 1-2Man $\alpha$ 1-6)Man $\beta$ 1-4GlcNAc $\beta$ 1-4(Fuca1-6)GlcNAc $\beta$ -Sp22                        | 357   | 132 |
| 76 | 278 | Neu5Gc $\alpha$ 2-3Gal $\beta$ 1-3(Fuca1-4)GlcNAc $\beta$ -Sp0                                                                                                                                              | 107   | 22  |
| 77 | 394 | Gal $\alpha$ 1-3Gal $\beta$ 1-3(Fuca1-4)GlcNAc $\beta$ 1-2Man $\alpha$ 1-3(Gal $\alpha$ 1-3Gal $\beta$ 1-3(Fuca1-4)GlcNAc $\beta$ 1-2Man $\alpha$ 1-6)Man $\beta$ 1-4GlcNAc $\beta$ 1-4GlcNAc $\beta$ -Sp19 | 8     | 5   |
| 78 | 353 | Gal $\beta$ 1-3(Fuca1-4)GlcNAc $\beta$ 1-2Man $\alpha$ 1-3(Gal $\beta$ 1-3(Fuca1-4)GlcNAc $\beta$ 1-2Man $\alpha$ 1-6)Man $\beta$ 1-4GlcNAc $\beta$ 1-4GlcNAc $\beta$ -Sp19                                 | 7     | 6   |
| 79 | 60  | Fuca1-2Gal $\beta$ 1-3(Fuca1-4)GlcNAc $\beta$ -Sp8                                                                                                                                                          | 3043  | 164 |
| 80 | 384 | Fuca1-2Gal $\beta$ 1-3(Fuca1-4)GlcNAc $\beta$ 1-3(Gal $\beta$ 1-4(Fuca1-3)GlcNAc $\beta$ 1-6)Gal $\beta$ 1-4Glc-Sp21                                                                                        | 2754  | 70  |
| 81 | 383 | Fuca1-2Gal $\beta$ 1-3(Fuca1-4)GlcNAc $\beta$ 1-3(Gal $\beta$ 1-4GlcNAc $\beta$ 1-6)Gal $\beta$ 1-4Glc-Sp21                                                                                                 | 1182  | 339 |
| 82 | 408 | Gal $\alpha$ 1-3(Fuca1-2)Gal $\beta$ 1-4(Fuca1-3)Glc $\beta$ -Sp21                                                                                                                                          | 570   | 50  |
| 83 | 374 | Fuca1-2Gal $\beta$ 1-3(Fuca1-4)GlcNAc $\beta$ 1-2Man $\alpha$ 1-3(Fuca1-2Gal $\beta$ 1-3(Fuca1-4)GlcNAc $\beta$ 1-2Man $\alpha$ 1-6)Man $\beta$ 1-4GlcNAc $\beta$ 1-4GlcNAc $\beta$ -Sp19                   | 56    | 11  |
| 84 | 416 | Gal $\alpha$ 1-3(Fuca1-2)Gal $\beta$ 1-4(Fuca1-3)GlcNAc $\beta$ 1-3GalNAc-Sp14                                                                                                                              | 19    | 7   |
| 85 | 79  | Fuca1-3GlcNAc $\beta$ -Sp8                                                                                                                                                                                  | 11151 | 989 |
| 86 | 290 | Gal $\beta$ 1-4(Fuca1-3)GlcNAc $\beta$ 1-3Gal $\beta$ 1-3(Fuca1-4)GlcNAc $\beta$ -Sp0                                                                                                                       | 1598  | 543 |
| 87 | 151 | Gal $\beta$ 1-4(Fuca1-3)GlcNAc $\beta$ 1-4Gal $\beta$ 1-4(Fuca1-3)GlcNAc $\beta$ -Sp0                                                                                                                       | 1448  | 94  |
| 88 | 152 | Gal $\beta$ 1-4(Fuca1-3)GlcNAc $\beta$ 1-4Gal $\beta$ 1-4(Fuca1-3)GlcNAc $\beta$ 1-4Gal $\beta$ 1-4(Fuca1-3)GlcNAc $\beta$ -Sp0                                                                             | 1268  | 58  |
| 89 | 150 | Gal $\beta$ 1-4(Fuca1-3)GlcNAc $\beta$ -Sp8                                                                                                                                                                 | 1164  | 75  |
| 90 | 325 | Fuca1-3(Gal $\beta$ 1-4)GlcNAc $\beta$ 1-2Man $\alpha$ 1-3(Fuca1-3(Gal $\beta$ 1-4)GlcNAc $\beta$ 1-2Man $\alpha$ 1-6)Man $\beta$ 1-4GlcNAc $\beta$ 1-4GlcNAc $\beta$ -Sp20                                 | 876   | 129 |
| 91 | 113 | Gal $\alpha$ 1-3Gal $\beta$ 1-4(Fuca1-3)GlcNAc $\beta$ -Sp8                                                                                                                                                 | 867   | 38  |
| 92 | 382 | Gal $\beta$ 1-3GlcNAc $\beta$ 1-3(Gal $\beta$ 1-4(Fuca1-3)GlcNAc $\beta$ 1-6)Gal $\beta$ 1-4Glc-Sp21                                                                                                        | 783   | 82  |
| 93 | 97  | GalNAc $\beta$ 1-4(Fuca1-3)GlcNAc $\beta$ -Sp0                                                                                                                                                              | 773   | 225 |
| 94 | 32  | [3OSO3]Gal $\beta$ 1-4(Fuca1-3)GlcNAc $\beta$ -Sp8                                                                                                                                                          | 672   | 53  |
| 95 | 251 | Neu5Ac $\alpha$ 2-3Gal $\beta$ 1-4(Fuca1-3)GlcNAc $\beta$ 1-3Gal $\beta$ 1-4(Fuca1-3)GlcNAc $\beta$ 1-3Gal $\beta$ 1-4(Fuca1-3)GlcNAc $\beta$ -Sp0                                                          | 627   | 24  |
| 96 | 429 | Gal $\beta$ 1-4GlcNAc $\beta$ 1-3Gal $\beta$ 1-4(Fuca1-3GlcNAc $\beta$ 1-6)Gal $\beta$ 1-4Glc-Sp21                                                                                                          | 615   | 87  |
| 97 | 288 | Gal $\beta$ 1-4(Fuca1-3)[6OSO3]GlcNAc-Sp0                                                                                                                                                                   | 546   | 37  |
| 98 | 340 | GlcNAc $\alpha$ 1-4Gal $\beta$ 1-4GlcNAc $\beta$ 1-3Gal $\beta$ 1-4(Fuca1-3)GlcNAc $\beta$ 1-3Gal $\beta$ 1-4(Fuca1-3)GlcNAc $\beta$ -Sp0                                                                   | 522   | 148 |

|     |     |                                                                                                                                                    |      |     |
|-----|-----|----------------------------------------------------------------------------------------------------------------------------------------------------|------|-----|
| 99  | 159 | Galβ1-4GlcNAcβ1-3Galβ1-4(Fuca1-3)GlcNAcβ1-3Galβ1-4(Fuca1-3)GlcNAcβ-Sp0                                                                             | 498  | 49  |
| 100 | 268 | Neu5Aca2-6Galβ1-4GlcNAcβ1-3Galβ1-4(Fuca1-3)GlcNAcβ1-3Galβ1-4(Fuca1-3)GlcNAcβ-Sp0                                                                   | 371  | 50  |
| 101 | 385 | Galβ1-3GlcNAcβ1-3(Galβ1-3GlcNAcβ1-3Galβ1-4(Fuca1-3)GlcNAcβ1-6)Galβ1-4Glc-Sp21                                                                      | 353  | 181 |
| 102 | 84  | [3OSO3]Galβ1-4(Fuca1-3)Glc-Sp0                                                                                                                     | 341  | 208 |
| 103 | 253 | Neu5Aca2-3Galβ1-4(Fuca1-3)GlcNAcβ-Sp8                                                                                                              | 299  | 30  |
| 104 | 289 | Galβ1-4(Fuca1-3)[6OSO3]Glc-Sp0                                                                                                                     | 294  | 101 |
| 105 | 399 | Galβ1-4(Fuca1-3)GlcNAcβ1-3GalNAca-Sp14                                                                                                             | 243  | 55  |
| 106 | 23  | [3OSO3]Galβ1-4(Fuca1-3)[6OSO3]Glc-Sp0                                                                                                              | 231  | 36  |
| 107 | 255 | Neu5Aca2-3Galβ1-4(Fuca1-3)GlcNAcβ1-3Galβ1-4GlcNAcβ-Sp8                                                                                             | 227  | 34  |
| 108 | 254 | Neu5Aca2-3Galβ1-4(Fuca1-3)GlcNAcβ1-3Galβ-Sp8                                                                                                       | 150  | 23  |
| 109 | 250 | Neu5Aca2-3Galβ1-4(Fuca1-3)[6OSO3]GlcNAcβ-Sp8                                                                                                       | 108  | 13  |
| 110 | 371 | Galα1-3Galβ1-4(Fuca1-3)GlcNAcβ1-2Mana1-3(Galα1-3Galβ1-4(Fuca1-3)GlcNAcβ1-2Mana1-6)Manβ1-4GlcNAcβ1-4GlcNAcβ-Sp20                                    | 94   | 6   |
| 111 | 228 | Neu5Aca2-3(6-O-Su)Galβ1-4(Fuca1-3)GlcNAcβ-Sp8                                                                                                      | 93   | 9   |
| 112 | 217 | [3OSO3]Galβ1-4(Fuca1-3)[6OSO3]GlcNAc-Sp8                                                                                                           | 91   | 5   |
| 113 | 280 | Neu5Gca2-3Galβ1-4(Fuca1-3)GlcNAcβ-Sp0                                                                                                              | 59   | 14  |
| 114 | 449 | Galβ1-4(Fuca1-3)GlcNAcβ1-6GalNAc-Sp14                                                                                                              | 59   | 14  |
| 115 | 297 | Galβ1-3(Neu5Aca2-3Galβ1-4(Fuca1-3)GlcNAcβ1-6)GalNAca-Sp14                                                                                          | 20   | 7   |
| 116 | 335 | Neu5Aca2-3-Galβ1-3(Galβ1-4(Fuca1-3)GlcNAcβ1-6)GalNAc-Sp14                                                                                          | 16   | 7   |
| 117 | 355 | KDNα2-3Galβ1-4(Fuca1-3)GlcNAc-Sp0                                                                                                                  | 14   | 6   |
| 118 | 418 | Galβ1-4(Fuca1-3)GlcNAcβ1-2Mana1-3(Galβ1-4(Fuca1-3)GlcNAcβ1-2Mana1-6)Manβ1-4GlcNAcβ1-4(Fuca1-6)GlcNAcβ-Sp22                                         | 14   | 6   |
| 119 | 377 | Neu5Aca2-3Galβ1-4(Fuca1-3)GlcNAcβ1-3GalNAca-Sp14                                                                                                   | 14   | 3   |
| 120 | 216 | Neu5Aca2-3Galβ1-4GlcNAcβ1-3Galβ1-4(Fuca1-3)GlcNAc-Sp0                                                                                              | 4    | 1   |
| 121 | 69  | Fuca1-2Galβ1-4(Fuca1-3)GlcNAcβ1-3Galβ1-4(Fuca1-3)GlcNAcβ-Sp0                                                                                       | 5159 | 466 |
| 122 | 72  | Fuca1-2Galβ1-4(Fuca1-3)GlcNAcβ-Sp8                                                                                                                 | 3642 | 261 |
| 123 | 70  | Fuca1-2Galβ1-4(Fuca1-3)GlcNAcβ1-3Galβ1-4(Fuca1-3)GlcNAcβ1-3Galβ1-4(Fuca1-3)GlcNAcβ-Sp0                                                             | 2468 | 123 |
| 124 | 361 | Fuca1-2Galβ1-4(Fuca1-3)GlcNAcβ1-2Mana1-3(Fuca1-2Galβ1-4(Fuca1-3)GlcNAcβ1-2Mana1-6)Manβ1-4GlcNAcβ1-4GlcNAβ-Sp20                                     | 379  | 197 |
| 125 | 446 | Fuca1-2Galβ1-4(Fuca1-3)GlcNAcβ1-2(Fuca1-2Galβ1-4(Fuca1-3)GlcNAcβ1-4)Mana1-3(Fuca1-2Galβ1-4(Fuca1-3)GlcNAcβ1-2Mana1-6)Manβ1-4GlcNAcβ1-4GlcNAcβ-Sp12 | 250  | 84  |
| 126 | 415 | Fuca1-2Galβ1-4(Fuca1-3)GlcNAcβ1-3GalNAca-Sp14                                                                                                      | 40   | 19  |
| 127 | 351 | Galβ1-4GlcNAcβ1-2Mana1-3(Galβ1-4GlcNAcβ1-2Mana1-6)Manβ1-4GlcNAcβ1-4(Fuca1-6)GlcNAcβ-Sp22                                                           | 826  | 60  |
| 128 | 350 | GlcNAcβ1-2Mana1-3(GlcNAcβ1-2Mana1-6)Manβ1-4GlcNAcβ1-4(Fuca1-6)GlcNAcβ-Sp22                                                                         | 530  | 15  |
| 129 | 352 | Galβ1-3GlcNAcβ1-2Mana1-3(Galβ1-3GlcNAcβ1-2Mana1-6)Manβ1-4GlcNAcβ1-4(Fuca1-6)GlcNAcβ-Sp22                                                           | 290  | 30  |

Table S3.  $\Phi$  and  $\Psi$  torsion angles of at the glycosidic linkages of all oligosaccharides bound to BamBL<sup>a</sup>

|                       | glycan <sup>a</sup>       | $\alpha$ Fuc1-<br>2Gal | $\alpha$ Gal1-<br>3Gal | $\beta$ Gal1-<br>4Glc | $\beta$ Gal1-<br>3GlcNAc | $\beta$ GlcNAc1-<br>3Gal | $\beta$ Gal1-<br>4GlcNAc |
|-----------------------|---------------------------|------------------------|------------------------|-----------------------|--------------------------|--------------------------|--------------------------|
| <b>B-tetra</b>        |                           |                        |                        |                       |                          |                          |                          |
| Site A                | $\alpha$ Fuc1-2Gal        | -90, -130              |                        |                       |                          |                          |                          |
| Site AB               | Fuc                       |                        |                        |                       |                          |                          |                          |
| Site B                | B-tetra                   | -111, -153             | 143, 148               | -66,163               |                          |                          |                          |
| Site BC               | Fuc                       |                        |                        |                       |                          |                          |                          |
| Site C                | B-tetra                   | -95, -163              | 137 133                | -55, -100             |                          |                          |                          |
| Site CA               | Fuc                       |                        |                        |                       |                          |                          |                          |
| <b>H-type tetra</b>   |                           |                        |                        |                       |                          |                          |                          |
| Site A                | H-type 1 tri <sup>c</sup> | -106, -141             |                        |                       | -44, 161                 |                          |                          |
| Site AB               | $\alpha$ Fuc1-2Gal        | -83, -121              |                        |                       |                          |                          |                          |
| Site B                | H-type 1 tri              | -125, -141             |                        |                       | -37, 117                 |                          |                          |
| Site BC               | H-type 1 tri              | -142, -142             |                        |                       | -56, -179                |                          |                          |
| Site C                | H-type 1 tetra            | -115, -143             |                        |                       | -52, 167                 | -75, 90                  |                          |
| Site CA               | H-type 1 tri              | -130, -146             |                        |                       | -52, 119                 |                          |                          |
| <b>H-type 2 tetra</b> |                           |                        |                        |                       |                          |                          |                          |
| Site A                | H-type 2 tri <sup>c</sup> | -126, -144             |                        |                       |                          |                          | -65, -123                |
| Site AB               | H-type 2 tri              | -124, -146             |                        |                       |                          |                          | -79, 81                  |
| Site B                | H-type 2 tri              | -142, -137             |                        |                       |                          |                          | -70, -129                |
| Site BC               | Fuc                       |                        |                        |                       |                          |                          |                          |
| Site C                | H-type 2 tri              | -136, -142             |                        |                       |                          |                          | -69, -122                |
| Site CA               | H-type 2 tri              | -108, -175             |                        |                       |                          |                          | -70, 88                  |

<sup>a</sup> Torsion angles defined as :  $\Phi = \Theta(\text{O-5} - \text{C-1} - \text{O-1} - \text{C-x})$ ,  $\Psi = \Theta\Theta(\text{C-1} - \text{O-1} - \text{C-x} - \text{C-x+1})$

<sup>b</sup> Fraction of the oligosaccharides that can be seen in the electron density

<sup>c</sup> H-type 1 tri :  $\alpha$ Fuc1-2 $\beta$ Gal1-3GlcNAc, H-type 2 tri:  $\alpha$ Fuc1-2 $\beta$ Gal1-4GlcNAc
